# Supplementary material for: Genomic analyses provide insights into breed-of-origin effects from purebreds on three-way crossbred pigs
Source: PeerJ. 2019 Nov 11;7:e8009. doi: 10.7717/peerj.8009 (PMC6855203; doi:10.7717/peerj.8009)
Supplement: Supplemental Information 3 [file peerj-07-8009-s003.xlsx]

## Sheet: Adipose
Enesmbl geneID	Gene Symbol	DLY1_ratio	DLY1_FDR	DLY2_ratio	DLY2_FDR	DLY3_ratio	DLY3_FDR	DLY4_ratio	DLY4_FDR	DLY5_ratio	DLY5_FDR	DLY6_ratio	DLY6_FDR
ENSSSCG00000000576	LDHB	NS	NS	0.92397	1.17024e-172	0.923761	6.78762e-288	0.950108	1.73297e-295	NS	NS	NS	NS
ENSSSCG00000000985	EXOC2	0.604587	6.98006e-12	0.580786	0.000159384	0.628684	6.45682e-13	NS	NS	0.619689	3.22171e-10	0.60687	1.55397e-08
ENSSSCG00000001780	FAH	0.621886	9.32053e-13	0.623229	1.89258e-07	NS	NS	NS	NS	NS	NS	NS	NS
ENSSSCG00000002306	GALNT16	NS	NS	NS	NS	0.564428	4.79233e-08	0.563774	6.15533e-07	NS	NS	0.577721	9.59339e-17
ENSSSCG00000002349	ACOT4	0.626697	3.89477e-23	0.622831	1.24834e-12	0.64872	6.07428e-28	0.621405	1.60656e-17	0.614194	6.84049e-16	0.642857	2.60432e-37
ENSSSCG00000003088	APOE	NS	NS	NS	NS	0.545814	1.90099e-20	NS	NS	NS	NS	0.544638	3.12003e-28
ENSSSCG00000003326	NA	1	1.1699e-14	1	2.23714e-11	1	4.94868e-05	1	1.41931e-12	1	1.47987e-06	1	6.01449e-09
ENSSSCG00000003465	FBLIM1	NS	NS	NS	NS	0.622103	2.63591e-05	0.614068	0.000602365	0.605081	0.0452608	0.647273	1.55141e-08
ENSSSCG00000003479	MFAP2	NS	NS	NS	NS	0.58867	4.53175e-12	0.565733	5.53275e-06	0.599311	3.50941e-13	0.589147	1.4815e-11
ENSSSCG00000003901	FAAH	0.734127	1.96884e-10	NS	NS	0.751073	2.61679e-11	0.773481	2.36238e-10	NS	NS	NS	NS
ENSSSCG00000004044	IGF2R	0.778502	6.28614e-20	0.9	1.32547e-05	0.746377	3.41904e-13	0.775316	4.70844e-20	0.753086	3.79838e-12	0.764505	9.36296e-17
ENSSSCG00000004110	TAB2	NS	NS	NS	NS	NS	NS	1	2.90675e-09	1	2.20518e-14	1	9.62318e-08
ENSSSCG00000004127	PLAGL1	1	1.92708e-97	0.989276	2.62585e-100	0.985163	8.46767e-88	0.996865	1.91522e-90	0.986842	6.89499e-80	0.987212	9.85951e-104
ENSSSCG00000004463	NA	NS	NS	NS	NS	NS	NS	1	1.45337e-09	1	4.73559e-05	1	1.87953e-10
ENSSSCG00000004700	PDIA3	NS	NS	NS	NS	0.637427	0.00139635	0.636804	9.40959e-05	0.64433	4.44521e-05	0.59761	0.0466322
ENSSSCG00000004774	IVD	NS	NS	NS	NS	0.657323	1.91592e-29	0.664606	2.82098e-29	0.681115	6.17406e-36	0.659686	4.9278e-37
ENSSSCG00000004834	NDN	NS	NS	NS	NS	NS	NS	1	1.0934e-45	0.994819	9.82192e-53	1	1.28603e-58
ENSSSCG00000004835	MAGEL2	NS	NS	NS	NS	NS	NS	0.944444	6.20416e-05	1	5.91949e-06	1	9.62318e-08
ENSSSCG00000006062	NA	0.998769	0	1	0	0.999495	0	1	0	1	0	0.999665	0
ENSSSCG00000006079	RIDA	0.699422	2.79977e-10	0.708995	2.6965e-05	0.673367	0.00375729	0.650888	9.97327e-05	0.658451	0.000321878	0.62156	0.00144234
ENSSSCG00000006821	GSTM3	0.714286	0.00017815	NS	NS	NS	NS	NS	NS	NS	NS	0.851852	2.32546e-07
ENSSSCG00000006889	ARHGAP29	0.563936	3.88557e-05	NS	NS	NS	NS	NS	NS	NS	NS	0.556425	0.00654142
ENSSSCG00000007336	NNAT	0.999278	0	0.991736	0	0.990764	0	0.990961	0	0.993329	0	0.985436	0
ENSSSCG00000007713	BUD23	NS	NS	NS	NS	NS	NS	NS	NS	0.617512	0.0035551	0.628205	7.34974e-06
ENSSSCG00000009211	PIGY	0.587336	3.44443e-07	0.653153	7.00549e-12	0.594243	2.22508e-06	0.59601	9.28807e-08	0.631929	6.5795e-12	0.605932	5.02344e-12
ENSSSCG00000009545	COL4A2	0.537308	1.48747e-56	0.523889	2.99599e-18	0.524317	2.87184e-22	0.53524	6.26474e-49	0.535963	1.69628e-45	0.519441	5.41851e-15
ENSSSCG00000009646	ADAM7	0.837438	6.69173e-20	0.650943	0.041325	0.71374	1.08936e-08	0.830189	9.49458e-09	0.7625	0.00868188	0.791411	1.0407e-10
ENSSSCG00000009666	EPHX2	0.680777	4.07295e-40	NS	NS	0.650862	3.57503e-26	0.62766	3.42262e-10	0.648298	3.85109e-22	NS	NS
ENSSSCG00000009668	CLU	0.602273	8.4811e-12	NS	NS	0.602141	2.76005e-08	0.61048	2.42411e-10	0.582031	1.52097e-05	NS	NS
ENSSSCG00000009953	NA	NS	NS	NS	NS	NS	NS	0.693467	0.000157111	NS	NS	0.696774	0.00350269
ENSSSCG00000010512	SLIT1	0.980769	7.93658e-11	0.995434	1.64432e-60	0.990354	7.9822e-84	1	6.303e-28	0.995604	7.08739e-129	0.994393	1.50061e-150
ENSSSCG00000010554	SCD	0.712936	4.77979e-218	0.715509	2.11074e-227	0.651934	1.08932e-168	NS	NS	0.659645	3.29158e-298	0.626788	0
ENSSSCG00000011033	VIM	0.531485	5.9084e-06	NS	NS	NS	NS	NS	NS	NS	NS	0.533939	7.25228e-05
ENSSSCG00000011625	CHST13	NS	NS	NS	NS	NS	NS	NS	NS	0.769231	0.00627026	0.810811	0.000205723
ENSSSCG00000011630	ACKR4	NS	NS	NS	NS	NS	NS	NS	NS	0.647782	3.46533e-42	0.662828	1.42159e-63
ENSSSCG00000011827	LSG1	0.876033	1.59012e-14	0.906977	4.797e-12	0.825581	2.34996e-06	0.847458	1.82973e-11	NS	NS	0.868421	7.78945e-13
ENSSSCG00000013046	NA	NS	NS	0.573043	0.00255055	0.597717	1.57236e-10	0.564725	8.71527e-05	NS	NS	NS	NS
ENSSSCG00000013318	NA	0.57736	6.04901e-37	NS	NS	0.575464	9.99938e-18	0.575432	6.91742e-28	NS	NS	0.658423	2.00637e-12
ENSSSCG00000014075	NA	1	8.36607e-262	1	7.4098e-181	NS	NS	NS	NS	NS	NS	NS	NS
ENSSSCG00000015009	KDELC2	NS	NS	NS	NS	0.595411	0.000147668	NS	NS	NS	NS	0.571185	0.00398771
ENSSSCG00000015328	SGCE	1	1.80251e-47	1	1.41184e-40	0.992701	5.261e-36	1	9.61761e-33	1	2.22666e-42	1	5.79174e-43
ENSSSCG00000015784	ACSL1	0.563227	5.36868e-21	0.55594	1.44447e-15	0.55498	5.6319e-15	0.558322	2.6171e-16	0.563097	1.46464e-29	0.559821	2.68221e-35
ENSSSCG00000016634	CAV1	NS	NS	NS	NS	NS	NS	0.605127	6.6853e-32	0.621195	9.52397e-32	NS	NS
ENSSSCG00000016816	ADAMTS12	0.633559	1.31423e-44	0.624952	2.33181e-34	0.597552	4.94992e-22	0.566312	7.89514e-08	0.624348	1.25985e-42	0.621905	7.99331e-47
ENSSSCG00000016886	NA	NS	NS	NS	NS	NS	NS	NS	NS	1	2.89037e-09	1	1.12029e-17
ENSSSCG00000016982	NA	1	1.69507e-84	1	4.78349e-61	1	5.04556e-61	1	1.04274e-51	1	4.94419e-58	1	7.66531e-66
ENSSSCG00000017086	SLC36A2	NS	NS	0.875	0.000317604	0.852459	5.98711e-05	NS	NS	0.734694	0.0117225	NS	NS
ENSSSCG00000020657	BCAM	NS	NS	NS	NS	0.539769	0.01783	NS	NS	NS	NS	0.537932	0.000339317
ENSSSCG00000020842	TAF13	1	6.04823e-40	0.988235	1.39985e-20	1	2.74707e-21	1	3.07764e-31	0.990741	2.13487e-27	1	1.27362e-30
ENSSSCG00000021325	NA	1	9.14934e-163	0.99723	4.85304e-103	NS	NS	NS	NS	NS	NS	NS	NS
ENSSSCG00000021355	SOD1	NS	NS	NS	NS	0.61474	7.5474e-05	0.604488	8.51382e-05	NS	NS	NS	NS
ENSSSCG00000021606	FLVCR2	0.756129	1.55403e-44	0.762115	5.94172e-41	0.813808	3.11102e-42	0.796215	3.58956e-54	0.738727	4.17695e-37	0.795918	5.95439e-58
ENSSSCG00000021668	KRT31	NS	NS	0.655	0.0436302	NS	NS	0.70869	4.45398e-30	NS	NS	0.732331	1.41119e-30
ENSSSCG00000021837	TMEM120A	NS	NS	NS	NS	NS	NS	NS	NS	0.627525	2.20396e-09	0.62865	4.63872e-14
ENSSSCG00000023091	NA	0.561928	1.97664e-06	NS	NS	0.584124	1.84753e-12	0.55577	0.00134668	NS	NS	NS	NS
ENSSSCG00000023247	OPTN	0.622525	1.10899e-08	0.653608	3.968e-08	NS	NS	NS	NS	NS	NS	0.635193	2.78754e-09
ENSSSCG00000023264	NA	0.556405	0.0292674	0.548768	2.58788e-06	0.571007	4.64704e-19	0.56149	0.0123761	0.561924	0.00490706	0.595698	7.76986e-60
ENSSSCG00000023320	CYP3A39	0.964286	1.49466e-10	0.953125	1.49328e-11	0.983051	1.40353e-28	0.97561	8.14205e-39	0.957746	1.60737e-13	0.935	3.90317e-37
ENSSSCG00000023371	EHD2	NS	NS	NS	NS	0.576631	6.35637e-11	NS	NS	NS	NS	0.571559	8.69772e-13
ENSSSCG00000023604	LAP3	0.568174	2.692e-09	0.579198	4.25182e-06	0.594336	2.3211e-19	0.587832	6.59322e-15	0.584096	7.88375e-07	0.58592	6.9024e-13
ENSSSCG00000023666	CTSB	0.581144	6.89715e-18	0.599156	1.16607e-20	NS	NS	0.566372	4.49041e-08	NS	NS	0.585472	1.3079e-24
ENSSSCG00000023912	ORAI2	NS	NS	NS	NS	NS	NS	NS	NS	0.597826	0.00247355	0.59824	0.00107332
ENSSSCG00000024134	MGLL	NS	NS	NS	NS	NS	NS	NS	NS	0.560021	0.000428841	0.619931	1.65503e-27
ENSSSCG00000024791	NA	0.616879	6.72824e-18	NS	NS	0.597056	5.54247e-07	0.650407	7.79044e-08	NS	NS	0.570067	0.0209582
ENSSSCG00000025192	NA	NS	NS	0.699666	1.65895e-94	NS	NS	0.754296	7.43049e-194	0.732454	3.36131e-161	NS	NS
ENSSSCG00000025468	NA	0.613297	1.01918e-14	0.685535	0.0104104	NS	NS	NS	NS	NS	NS	0.948718	3.2943e-14
ENSSSCG00000025486	MDH2	NS	NS	NS	NS	NS	NS	NS	NS	0.570307	5.91299e-28	0.562871	1.52902e-25
ENSSSCG00000028397	NA	NS	NS	0.626984	1.38069e-10	0.581568	0.00200221	NS	NS	0.586777	0.000235962	NS	NS
ENSSSCG00000029944	FASN	0.669186	1.65888e-102	0.532073	1.33254e-08	0.533253	2.31347e-13	0.555664	0.00164291	0.616339	4.69728e-163	0.533142	2.25248e-06
ENSSSCG00000030548	HERC5	0.619377	3.49096e-05	0.708543	1.46235e-13	0.656992	3.29557e-06	0.622363	0.000354901	0.690391	2.95072e-16	0.624528	3.5432e-05
ENSSSCG00000030938	NA	1	9.45036e-42	1	1.74777e-13	0.986486	2.63718e-17	1	8.66278e-17	1	7.22594e-10	1	8.34678e-26
ENSSSCG00000031262	TXNIP	0.537159	6.80666e-09	0.537183	1.35641e-07	0.522147	0.0284761	0.528111	1.67196e-07	0.525569	0.00581458	0.532417	8.1062e-08
ENSSSCG00000031378	NA	1	2.45345e-08	1	2.23714e-11	NS	NS	1	2.97651e-06	1	7.22594e-10	1	1.53971e-06
ENSSSCG00000031785	NA	1	1.53341e-09	NS	NS	NS	NS	NS	NS	NS	NS	0.976744	3.30797e-08
ENSSSCG00000031838	NA	0.743697	9.21217e-11	0.75974	2.25577e-07	0.73822	1.0383e-07	0.71345	7.24935e-05	0.745856	7.64174e-08	0.720812	1.5502e-06
ENSSSCG00000032723	NA	0.58906	0.00754846	0.66843	2.48408e-12	0.647475	3.99173e-17	0.641566	8.83095e-10	0.639449	2.82247e-14	0.6366	1.63666e-23
ENSSSCG00000032950	SLC25A34	NS	NS	NS	NS	0.698065	3.69026e-67	0.647059	1.14593e-59	0.662093	5.90911e-39	0.685743	4.32654e-89
ENSSSCG00000033727	GPX1	0.847291	6.21813e-45	0.812121	3.65381e-28	0.853591	1.48466e-41	0.882353	1.55681e-39	NS	NS	0.816929	4.86012e-46
ENSSSCG00000034663	NA	0.997845	0	1	7.34595e-299	1	0	1	3.26197e-199	1	0	0.999404	0
ENSSSCG00000034727	CCDC24	NS	NS	0.726619	0.00027762	NS	NS	NS	NS	0.735849	0.00397639	0.758389	6.17022e-07
ENSSSCG00000034874	FANCG	0.695341	1.95035e-07	0.695238	4.75165e-05	NS	NS	0.657025	0.0037619	0.699507	4.04784e-05	NS	NS
ENSSSCG00000035293	NA	NS	NS	0.960266	0	0.978435	0	0.971519	0	0.837571	3.2266e-207	NS	NS
ENSSSCG00000035805	DLK1	0.996109	7.51326e-72	1	1.83267e-07	1	2.19765e-20	1	2.5212e-27	0.996479	5.82787e-80	1	7.3419e-13
ENSSSCG00000035839	TOP3A	0.5573	2.65681e-05	0.55589	0.00205187	NS	NS	NS	NS	0.557958	0.00785792	NS	NS
ENSSSCG00000036049	PEG10	1	1.92708e-97	0.989189	2.20935e-48	0.99458	3.77081e-103	1	5.14112e-83	0.997191	1.54587e-101	1	1.75987e-106
ENSSSCG00000036438	GPX3	0.566203	1.99734e-05	0.577387	1.69079e-08	0.587302	2.46475e-18	0.562906	2.8256e-09	0.56462	1.12131e-11	0.602767	9.87058e-36
ENSSSCG00000036883	FABP3	0.535813	0.00118158	NS	NS	NS	NS	0.542986	0.000469387	NS	NS	NS	NS
ENSSSCG00000037158	MTURN	0.801743	5.18463e-37	0.627907	0.00760422	0.756447	5.85765e-19	0.807018	2.95109e-38	0.743902	9.82757e-16	0.727763	2.18365e-15
ENSSSCG00000037307	NA	1	6.13363e-09	NS	NS	1	0.000197947	1	0.0487671	1	0.000189424	1	2.46353e-05
ENSSSCG00000037324	NA	1	3.74367e-13	NS	NS	0.991525	2.37852e-30	1	8.45974e-20	NS	NS	0.992481	8.13793e-35
ENSSSCG00000037582	F2RL2	0.666667	2.50457e-21	NS	NS	0.663701	7.52378e-25	0.689601	3.1115e-39	NS	NS	NS	NS
ENSSSCG00000038399	NA	0.61435	1.21333e-05	0.652941	5.71521e-05	0.646778	6.45987e-06	0.627417	4.11665e-06	NS	NS	0.62945	4.1864e-07
ENSSSCG00000039874	CCL26	NS	NS	NS	NS	NS	NS	NS	NS	0.65	6.5038e-06	0.764706	1.12489e-07
ENSSSCG00000039927	NA	NS	NS	0.625	0.0026732	NS	NS	0.612705	0.00232081	NS	NS	0.689373	1.36812e-21
ENSSSCG00000040535	NA	0.844037	4.13594e-10	NS	NS	0.746835	0.0430637	NS	NS	0.92	1.41795e-06	NS	NS

## Sheet: Heart
Enesmbl geneID	Gene Symbol	DLY1_ratio	DLY1_FDR	DLY2_ratio	DLY2_FDR	DLY3_ratio	DLY3_FDR	DLY4_ratio	DLY4_FDR	DLY5_ratio	DLY5_FDR	DLY6_ratio	DLY6_FDR
ENSSSCG00000000549	PPFIBP1	0.562329	0.0063515	0.599214	7.71761e-07	0.613852	4.24071e-10	0.565985	0.0492542	0.561917	0.00534492	0.563777	0.00502032
ENSSSCG00000000576	LDHB	NS	NS	0.907573	0	0.914301	0	0.931679	0	NS	NS	NS	NS
ENSSSCG00000001229	NA	0.832297	0	0.708493	3.94107e-253	0.711552	1.58643e-275	0.840143	0	0.686149	3.32695e-191	0.672051	4.17667e-148
ENSSSCG00000002029	MYH7	0.524632	2.31632e-24	0.532741	7.27811e-28	NS	NS	NS	NS	NS	NS	NS	NS
ENSSSCG00000002349	ACOT4	0.670172	4.44312e-25	0.67556	7.41227e-24	0.664678	2.67123e-18	0.692543	1.28659e-30	0.6702	5.54856e-20	0.666211	4.81348e-16
ENSSSCG00000003326	NA	0.982456	2.4256e-12	1	3.43425e-07	1	4.30664e-08	1	2.1395e-08	1	5.527e-09	1	2.18265e-05
ENSSSCG00000003430	NPPA	0.674523	2.77378e-22	0.690722	5.20999e-17	0.660482	2.32555e-10	0.614754	4.66385e-05	0.674221	1.6415e-07	0.707547	3.93539e-06
ENSSSCG00000003486	ARHGEF10L	0.619289	2.17876e-05	0.602386	0.0148754	0.597826	5.90401e-05	0.619116	8.81565e-07	0.616292	3.7069e-09	0.611111	3.14258e-06
ENSSSCG00000003691	NA	0.689688	3.8462e-32	0.676026	1.08425e-23	0.59598	4.52042e-06	0.59381	5.15499e-06	0.606203	1.33979e-08	0.638985	6.83636e-13
ENSSSCG00000003693	MYOM1	0.580073	4.62902e-26	0.581178	1.22652e-21	0.56357	1.19952e-13	0.55786	1.48945e-11	0.539372	5.0757e-05	0.544698	2.92683e-06
ENSSSCG00000003903	NA	0.548279	2.52695e-18	NS	NS	0.534754	3.07983e-05	0.544997	3.22102e-12	NS	NS	NS	NS
ENSSSCG00000004110	TAB2	NS	NS	NS	NS	NS	NS	1	1.30584e-12	1	1.76864e-07	1	1.09132e-05
ENSSSCG00000004127	PLAGL1	0.994595	2.28594e-50	0.993827	1.64505e-43	1	1.08715e-36	1	6.59283e-41	1	8.72007e-39	1	5.01111e-46
ENSSSCG00000004463	NA	NS	NS	NS	NS	NS	NS	1	4.38169e-05	1	0.00579548	1	0.00139689
ENSSSCG00000004834	NDN	NS	NS	NS	NS	NS	NS	1	3.42319e-07	1	9.05544e-05	1	8.73059e-05
ENSSSCG00000005976	NDUFB9	0.635408	3.72182e-18	0.613911	2.14315e-09	NS	NS	NS	NS	0.673378	4.89033e-22	0.653033	4.30836e-59
ENSSSCG00000006062	NA	1	0	1	8.20496e-306	1	0	1	3.49385e-209	1	0	1	4.8565520856506e-313
ENSSSCG00000006079	RIDA	0.735178	1.19319e-10	0.686567	2.11058e-08	0.69084	1.76919e-06	0.667458	1.67187e-08	0.684397	1.67929e-06	0.697595	3.73694e-08
ENSSSCG00000006166	NDUFB8	0.561832	4.72477e-09	0.567568	1.53336e-07	0.549537	0.0133345	0.640867	0.00137068	0.565759	3.03907e-06	0.55254	0.0393545
ENSSSCG00000006469	MRPL24	0.60333	1.81799e-14	NS	NS	NS	NS	NS	NS	0.638486	3.57135e-19	0.60338	1.69458e-07
ENSSSCG00000006470	RRNAD1	0.60168	2.96235e-13	NS	NS	NS	NS	NS	NS	0.62605	8.94246e-15	0.603397	1.87813e-07
ENSSSCG00000006502	ARHGEF2	NS	NS	0.647945	3.22348e-12	0.622673	7.81693e-06	0.674055	8.49801e-19	NS	NS	NS	NS
ENSSSCG00000006872	AGL	0.537664	0.0165421	0.576097	2.16685e-20	0.57809	3.42342e-17	0.543955	8.71963e-07	0.552016	5.13336e-09	0.564938	1.12058e-06
ENSSSCG00000009097	ANXA5	0.591175	1.18597e-20	0.576752	2.34115e-14	0.570043	4.53357e-10	0.564988	2.42493e-09	0.557721	8.15016e-06	0.559911	4.36358e-05
ENSSSCG00000009281	SGCG	0.705094	4.25419e-12	0.6743	2.25734e-19	0.68956	1.07614e-09	0.679558	2.11584e-08	0.646526	1.27255e-10	0.66087	6.21176e-14
ENSSSCG00000009668	CLU	0.882412	1.48529e-284	NS	NS	0.889511	3.14195e-293	0.876852	2.00976e-270	0.883745	3.31367e-280	NS	NS
ENSSSCG00000009717	CBR4	0.643411	9.02251e-10	0.599691	0.00131574	NS	NS	0.636132	6.17259e-11	NS	NS	0.650924	7.70305e-08
ENSSSCG00000010359	NA	0.573676	4.83682e-55	0.5817	1.40284e-49	0.576354	2.40032e-41	NS	NS	0.563389	6.87554e-26	0.578066	8.98455e-38
ENSSSCG00000010444	LIPM	1	2.32152e-30	1	6.77287e-38	1	3.13349e-19	NS	NS	1	1.96358e-23	1	7.3951e-26
ENSSSCG00000010798	GGA2	0.599506	9.54547e-16	0.610998	4.35902e-14	0.622918	3.96433e-18	0.58306	2.84732e-07	0.576877	9.90119e-07	0.595092	2.0129e-08
ENSSSCG00000011827	LSG1	0.927928	1.10943e-18	0.862745	8.18739e-11	0.895238	4.10462e-14	0.87069	2.27971e-13	NS	NS	0.9	2.15898e-15
ENSSSCG00000013046	NA	NS	NS	0.601633	3.67453e-18	0.584673	7.94714e-10	0.568699	3.7493e-07	NS	NS	NS	NS
ENSSSCG00000014075	NA	1	1.50181e-202	1	2.08922e-216	NS	NS	NS	NS	NS	NS	NS	NS
ENSSSCG00000014307	H2AFY	0.603774	4.0932e-10	0.601757	1.61208e-10	0.58479	3.16336e-05	0.631402	9.10109e-21	0.593688	8.03818e-06	0.581745	0.000798209
ENSSSCG00000015328	SGCE	1	5.35305e-12	1	4.1922e-11	1	1.31428e-12	1	4.27899e-08	1	2.10838e-14	1	1.27047e-15
ENSSSCG00000015857	UGGT1	NS	NS	0.592593	0.0215708	0.603143	0.0110736	NS	NS	NS	NS	NS	NS
ENSSSCG00000016199	CYP27A1	0.938776	2.10375e-07	0.814815	0.00998777	0.907407	1.15166e-06	0.979592	5.22338e-10	NS	NS	NS	NS
ENSSSCG00000016349	NDUFA10	0.53582	0.0166211	NS	NS	NS	NS	NS	NS	0.556412	7.05867e-05	NS	NS
ENSSSCG00000016634	CAV1	NS	NS	NS	NS	NS	NS	0.607033	1.85988e-14	0.584197	1.19462e-07	NS	NS
ENSSSCG00000016714	CYCS	NS	NS	0.547486	5.05422e-19	0.535175	3.94736e-08	NS	NS	0.540065	1.4129e-10	0.534466	8.01246e-08
ENSSSCG00000016886	NA	NS	NS	NS	NS	NS	NS	NS	NS	1	8.8432e-08	1	5.45662e-06
ENSSSCG00000016982	NA	1	2.69093e-99	1	7.24091e-88	1	3.51277e-63	1	1.66426e-69	1	2.09928e-73	1	2.30099e-86
ENSSSCG00000017868	NA	0.748274	1.33849e-87	NS	NS	0.777414	7.22074e-85	0.743119	3.58746e-80	0.626632	0.00249135	0.743827	1.03986e-50
ENSSSCG00000020842	TAF13	1	5.10507e-18	1	9.30856e-27	1	1.95843e-20	0.987342	7.78344e-19	0.988372	6.83327e-21	1	3.10173e-19
ENSSSCG00000021325	NA	1	2.6306e-248	1	1.09536e-210	NS	NS	NS	NS	NS	NS	NS	NS
ENSSSCG00000021638	NEU3	0.692568	8.81194e-08	0.806818	1.52042e-05	0.856209	1.30805e-16	0.655303	0.00148745	0.728395	2.0518e-09	0.766129	6.45851e-06
ENSSSCG00000021911	NDRG4	0.748901	7.02136e-101	0.724309	2.71654e-62	0.659004	1.48779e-21	0.713924	1.11882e-30	0.744279	5.0762e-93	0.706876	5.24139e-30
ENSSSCG00000022719	RAB20	0.844961	1.52852e-12	0.909091	1.35752e-12	0.833333	0.000478368	0.89313	5.9915e-18	0.809091	1.14405e-07	0.897059	2.16414e-08
ENSSSCG00000023031	TNNT2	0.544776	7.63399e-77	NS	NS	0.537535	1.82717e-39	NS	NS	NS	NS	0.527657	5.53447e-16
ENSSSCG00000023247	OPTN	0.712707	5.56218e-35	0.677949	1.17869e-25	NS	NS	NS	NS	NS	NS	0.636081	1.48112e-08
ENSSSCG00000023307	FBXW11	1	0.000718474	0.96	0.00457168	NS	NS	NS	NS	NS	NS	NS	NS
ENSSSCG00000023331	NA	NS	NS	0.57483	0.0292852	NS	NS	NS	NS	0.593602	0.000181696	0.600547	0.000176959
ENSSSCG00000023666	CTSB	0.550901	0.00215379	0.55723	0.00043032	NS	NS	0.550528	0.0211319	NS	NS	0.577674	1.81823e-09
ENSSSCG00000024505	TNNI3	NS	NS	0.561296	2.10243e-117	0.530482	2.58162e-22	0.548836	2.32253e-61	0.563092	4.6332e-93	0.531671	1.98738e-20
ENSSSCG00000025192	NA	NS	NS	0.740775	6.8062e-111	NS	NS	0.754797	2.23104e-109	0.762494	9.72041e-131	NS	NS
ENSSSCG00000025486	MDH2	NS	NS	NS	NS	NS	NS	NS	NS	0.528248	1.28783e-17	0.520581	2.73652e-07
ENSSSCG00000028682	NA	NS	NS	0.575048	6.44476e-47	0.554403	3.67322e-20	0.560039	7.15567e-21	0.579872	9.0227e-36	0.553274	3.97777e-14
ENSSSCG00000031352	TCTEX1D1	1	1.94743e-23	1	3.63616e-29	1	5.13391e-15	NS	NS	NS	NS	NS	NS
ENSSSCG00000032711	DMAC2	NS	NS	NS	NS	0.734177	9.73156e-10	NS	NS	NS	NS	0.69863	1.14378e-05
ENSSSCG00000033727	GPX1	0.869707	7.13774e-39	0.848148	2.23138e-29	0.873684	7.03328e-37	0.84264	4.85043e-20	NS	NS	0.792593	1.29975e-08
ENSSSCG00000034663	NA	1	6.29904e-196	1	6.10681e-168	1	4.56458e-176	1	6.88323e-94	1	1.37722e-214	1	7.4028e-172
ENSSSCG00000035293	NA	NS	NS	0.967542	0	0.969035	0	0.978778	0	0.922921	2.44138e-88	NS	NS
ENSSSCG00000035533	ANKRD39	0.730909	3.00049e-11	0.657143	0.0181829	NS	NS	NS	NS	0.651163	0.0334534	NS	NS
ENSSSCG00000035617	NA	0.806849	2.02749e-62	0.861968	1.58376e-84	0.824891	4.76733e-67	0.827804	1.66172e-62	0.795276	6.68522e-60	0.824561	3.75235e-49
ENSSSCG00000035728	NA	NS	NS	0.66835	4.93296e-13	0.636691	3.46e-07	NS	NS	0.634146	0.000186696	NS	NS
ENSSSCG00000036018	APOBEC2	NS	NS	NS	NS	NS	NS	0.559371	0.00277393	NS	NS	0.564119	0.00108433
ENSSSCG00000036132	CKM	NS	NS	NS	NS	0.574284	5.93042e-20	NS	NS	NS	NS	0.590422	1.3394e-19
ENSSSCG00000036305	NA	0.721239	6.44732e-08	0.668605	0.0341431	NS	NS	0.741935	0.000191959	0.734463	1.02744e-06	NS	NS
ENSSSCG00000036402	MYL9	NS	NS	NS	NS	0.623357	4.44835e-42	0.62603	5.43668e-39	0.653209	8.44871e-70	0.615732	1.5812e-29
ENSSSCG00000036724	CRYAB	0.551473	1.18095e-16	NS	NS	NS	NS	NS	NS	0.555795	4.84122e-12	NS	NS
ENSSSCG00000037324	NA	1	1.07061e-11	NS	NS	1	0.0112896	1	5.22338e-12	NS	NS	1	0.00558758
ENSSSCG00000038399	NA	0.635859	1.86804e-30	0.646779	2.66009e-34	0.665336	1.10979e-34	0.650905	9.77796e-33	NS	NS	0.665561	6.94948e-35
ENSSSCG00000038801	NPNT	NS	NS	0.750973	9.59472e-13	NS	NS	0.7	6.38017e-11	0.67979	5.69579e-09	NS	NS
ENSSSCG00000039522	SHISAL1	0.671111	0.000945506	0.638783	0.0234255	0.716981	3.27447e-09	0.756198	1.72198e-12	0.79538	1.36667e-22	0.717678	3.21055e-14
ENSSSCG00000039618	NA	0.720588	0.000822644	NS	NS	NS	NS	NS	NS	0.744186	0.0198846	0.777778	0.00702295
ENSSSCG00000039710	MYL2	NS	NS	NS	NS	0.520076	3.74757e-10	NS	NS	0.52404	2.81744e-15	NS	NS
ENSSSCG00000040109	NA	NS	NS	NS	NS	NS	NS	0.700535	1.6678e-11	0.636923	0.00275721	0.635338	0.0350193
ENSSSCG00000040325	NA	NS	NS	NS	NS	0.530102	2.04517e-13	0.529154	4.32755e-14	NS	NS	0.523665	3.76383e-06
ENSSSCG00000040535	NA	0.826087	2.12474e-09	NS	NS	0.811966	1.5728e-08	NS	NS	0.870968	2.98647e-10	NS	NS

## Sheet: Liver
Enesmbl geneID	Gene Symbol	DLY1_ratio	DLY1_FDR	DLY2_ratio	DLY2_FDR	DLY3_ratio	DLY3_FDR	DLY4_ratio	DLY4_FDR	DLY5_ratio	DLY5_FDR	DLY6_ratio	DLY6_FDR
ENSSSCG00000000046	CYP2D25	0.589749	7.6389e-33	0.525178	0.0333037	NS	NS	NS	NS	NS	NS	NS	NS
ENSSSCG00000000576	LDHB	NS	NS	0.884135	1.03067e-79	0.879888	8.87428e-49	0.901811	8.04488e-168	NS	NS	NS	NS
ENSSSCG00000001229	NA	0.841238	0	0.715505	0	0.737214	0	0.885236	0	0.71427	0	0.713043	0
ENSSSCG00000001780	FAH	0.589222	7.13713e-12	0.562154	9.01949e-05	NS	NS	NS	NS	NS	NS	NS	NS
ENSSSCG00000001849	ANPEP	NS	NS	NS	NS	0.66005	3.65581e-07	0.658933	1.08808e-07	0.74382	3.89637e-22	0.692857	5.22159e-12
ENSSSCG00000002013	DHRS4	0.556367	6.65035e-05	0.54789	0.00170733	NS	NS	NS	NS	NS	NS	NS	NS
ENSSSCG00000002351	NA	NS	NS	NS	NS	0.601942	3.13909e-12	0.547272	0.000329966	NS	NS	0.568756	3.06639e-06
ENSSSCG00000002486	NA	0.649197	1.81868597797228e-316	0.550067	1.48179e-09	0.690236	0	0.546152	7.89219e-29	0.637246	1.2315e-280	0.530694	2.34837e-07
ENSSSCG00000002487	SERPINA3-2	0.746011	0	0.665564	4.66022e-270	0.524531	1.28224e-20	0.524922	3.53215e-25	0.763459	0	0.618103	2.73229e-160
ENSSSCG00000002623	GSTA1	0.642683	7.24318e-13	0.781864	7.3177e-144	0.69697	2.13461e-117	0.688201	5.13232e-80	0.747616	2.52249e-150	0.772841	5.97828e-217
ENSSSCG00000002749	NA	NS	NS	NS	NS	0.533571	1.10571e-176	0.528751	1.62722e-99	NS	NS	0.528735	8.56589e-170
ENSSSCG00000003088	APOE	NS	NS	NS	NS	0.528845	1.43827e-33	NS	NS	NS	NS	0.518399	4.07038e-16
ENSSSCG00000003138	HSD17B14	NS	NS	NS	NS	0.700348	2.59577e-08	NS	NS	NS	NS	0.655914	5.44445e-06
ENSSSCG00000003326	NA	1	5.2629e-06	1	5.11482e-06	1	0.000171244	1	1.60391e-07	1	1.3439e-06	1	8.35598e-11
ENSSSCG00000003400	NMNAT1	0.621477	9.69836e-08	0.655786	1.32079e-12	0.602888	0.00418528	0.624611	7.82893e-07	0.637483	2.82254e-10	0.613014	0.000153869
ENSSSCG00000003414	ANGPTL7	0.793651	0.00852157	0.887097	6.67301e-07	0.824561	0.0021585	0.875	1.53279e-06	0.793103	0.023722	0.87037	6.73808e-05
ENSSSCG00000003486	ARHGEF10L	0.580396	0.00401839	0.597701	0.000139294	0.581974	1.27932e-05	0.605901	1.98809e-07	0.603748	2.98194e-12	0.652711	2.80828e-28
ENSSSCG00000003744	MOCOS	0.815534	1.75397e-07	0.854167	1.98886e-09	0.781818	6.41273e-06	NS	NS	NS	NS	NS	NS
ENSSSCG00000003825	CYP2J34	0.946565	2.45283e-25	0.971429	1.52499e-40	0.995146	1.15653e-56	1	9.88487e-40	0.981308	2.05575e-25	0.944444	1.05293e-27
ENSSSCG00000003891	CYP4A24	0.785857	4.12171e-74	0.98995	1.3603e-52	0.769828	8.81011e-76	0.784727	4.16444e-112	1	2.58825e-40	NS	NS
ENSSSCG00000003898	MKNK1	0.678191	1.16971e-08	NS	NS	0.697561	2.2308e-12	0.673469	3.39158e-07	NS	NS	NS	NS
ENSSSCG00000003901	FAAH	0.830904	1.12654e-33	NS	NS	0.756654	7.81453e-14	0.808581	4.59561e-25	NS	NS	NS	NS
ENSSSCG00000004001	A1BG	0.539635	1.15971e-07	0.534892	0.000267576	0.568289	3.13751e-24	0.664965	3.45416e-88	0.615479	1.20001e-74	0.573402	2.61618e-42
ENSSSCG00000004041	SLC22A1	0.79717	6.11819e-33	NS	NS	0.823362	1.05447e-32	0.656008	1.96419e-20	0.815556	3.33572e-40	0.794783	1.4646e-44
ENSSSCG00000004110	TAB2	NS	NS	NS	NS	NS	NS	1	4.10601e-05	1	8.39937e-08	1	3.42261e-07
ENSSSCG00000004700	PDIA3	NS	NS	NS	NS	0.648397	5.57455e-17	0.658621	4.51317e-24	0.660164	2.59437e-20	0.643847	2.94292e-19
ENSSSCG00000004834	NDN	NS	NS	NS	NS	NS	NS	1	4.78003e-15	0.981132	3.46043e-11	1	1.55642e-19
ENSSSCG00000006062	NA	1	2.08702e-123	1	1.03849e-120	1	3.39537e-122	1	1.99623e-67	1	7.75512e-135	0.997788	2.29043e-130
ENSSSCG00000006079	RIDA	0.573929	1.6321e-16	0.623328	2.31494e-55	0.598703	3.31187e-31	0.640716	3.21626e-85	0.568533	7.15521e-18	0.55836	5.91448e-12
ENSSSCG00000006355	APOA2	0.595952	2.96679e-89	NS	NS	0.621234	1.82256e-151	0.679388	2.22426e-301	NS	NS	0.557956	5.12497e-28
ENSSSCG00000006469	MRPL24	0.616327	8.50116e-07	NS	NS	NS	NS	NS	NS	0.579559	0.00985559	0.587558	0.000817044
ENSSSCG00000006470	RRNAD1	0.619114	4.57863e-07	NS	NS	NS	NS	NS	NS	0.578522	0.0124047	0.57842	0.00850248
ENSSSCG00000006702	FMO5	0.613788	3.58845e-15	0.634921	1.77387e-21	0.635666	3.52149e-51	0.572158	3.39383e-05	0.619961	5.72517e-24	0.644993	7.49787e-73
ENSSSCG00000006821	GSTM3	0.781818	6.30671e-06	NS	NS	NS	NS	NS	NS	NS	NS	0.946429	2.39231e-09
ENSSSCG00000007336	NNAT	0.965517	3.35652e-11	0.980769	6.46319e-11	0.928571	0.00871205	0.901408	8.8801e-21	0.898148	6.90113e-15	0.877551	0.000168396
ENSSSCG00000007371	HNF4A	0.546164	3.13901e-05	NS	NS	0.547515	3.74363e-07	0.545041	1.79011e-07	NS	NS	0.551593	2.4643e-10
ENSSSCG00000007642	NA	0.800566	0	0.792961	0	0.622518	8.53118e-79	0.711408	1.16612e-175	0.729633	5.16122e-224	0.618763	1.49703e-87
ENSSSCG00000007858	NA	0.751135	1.67213e-61	0.759131	2.04241e-60	0.556091	4.56689e-06	0.630785	2.76926e-41	0.593795	1.37548e-19	0.750423	1.22131e-99
ENSSSCG00000008314	NA	NS	NS	NS	NS	0.811189	6.96138e-11	NS	NS	0.818182	1.84262e-10	NS	NS
ENSSSCG00000008571	HADHA	NS	NS	NS	NS	0.556566	9.32517e-06	0.561763	2.60125e-16	NS	NS	0.559409	5.70739e-09
ENSSSCG00000008935	NA	NS	NS	NS	NS	NS	NS	0.576355	2.59629e-05	0.596517	0.00131729	0.595152	0.000150553
ENSSSCG00000009138	NA	0.570699	3.32102e-58	0.571212	3.65573e-45	0.559866	1.34901e-35	0.609931	3.20767e-99	0.566408	6.40554e-55	0.566039	8.9086e-53
ENSSSCG00000009223	NUDT9	0.664716	5.30355e-27	NS	NS	0.61007	2.35795e-16	0.684951	1.24269e-41	NS	NS	0.664593	1.28445e-44
ENSSSCG00000009225	HSD17B13	0.581695	1.06955e-06	NS	NS	0.569588	2.74088e-06	0.593492	5.83877e-14	NS	NS	0.600443	3.79927e-14
ENSSSCG00000009666	EPHX2	0.588392	1.27017e-13	NS	NS	0.603125	4.06553e-25	0.625503	2.26531e-22	0.618367	1.97332e-28	NS	NS
ENSSSCG00000009668	CLU	0.525237	0.000417093	NS	NS	0.528698	3.45192e-07	0.528386	0.000155659	0.52831	1.65644e-06	NS	NS
ENSSSCG00000010487	NA	0.997706	6.83079e-254	0.994214	6.3856e-294	1	3.11491e-16	0.883333	2.114e-06	NS	NS	0.996662	0
ENSSSCG00000010488	CYP2C49	0.926377	0	0.884405	0	0.920301	0	0.992337	0	0.888158	1.09813e-224	0.881124	0
ENSSSCG00000010723	ACADSB	0.619355	1.98778e-25	0.630227	4.99883e-39	0.63034	1.47435e-25	0.60665	4.11103e-30	0.610294	3.16342e-30	0.633955	7.67142e-51
ENSSSCG00000010947	FBP2	0.744966	4.90823e-06	0.916667	2.85108e-08	0.902655	3.5965e-16	0.925926	0.0155618	0.944444	1.33357e-12	0.891892	2.04414e-20
ENSSSCG00000010955	GOLM1	0.878505	7.29342e-13	0.672794	3.39673e-05	0.726984	1.08886e-12	0.674074	2.99662e-05	0.737226	5.49034e-12	0.858696	3.15572e-09
ENSSSCG00000011700	CP	0.623034	8.04829e-51	0.641389	4.1029e-48	NS	NS	NS	NS	NS	NS	0.525562	0.0253698
ENSSSCG00000011827	LSG1	0.854545	0.00022795	0.939394	1.0363e-17	0.911765	2.35068e-09	0.879518	1.59837e-09	NS	NS	0.842105	2.00296e-08
ENSSSCG00000013369	NA	1	0.000673652	1	0.0209503	0.925373	4.07832e-10	1	0.00131392	0.938776	2.01474e-07	1	9.277e-27
ENSSSCG00000013370	NA	0.889273	7.95654e-85	0.85258	9.32644e-47	0.873811	1.60938e-213	0.908416	4.85268e-134	0.856895	2.84477e-210	NS	NS
ENSSSCG00000013514	LRG1	0.626076	1.80061e-09	NS	NS	0.589928	6.42153e-05	0.620469	0.000561563	NS	NS	NS	NS
ENSSSCG00000014063	SFXN1	0.637441	5.01603e-05	NS	NS	0.640367	1.61606e-07	0.654799	8.15216e-12	NS	NS	NS	NS
ENSSSCG00000014075	NA	0.996528	3.28386e-81	0.997006	5.25723e-95	NS	NS	NS	NS	NS	NS	NS	NS
ENSSSCG00000014316	TGFBI	0.623839	9.13089e-07	NS	NS	NS	NS	0.638699	5.56313e-08	NS	NS	NS	NS
ENSSSCG00000014598	PPFIBP2	NS	NS	0.708683	5.08656e-12	0.636986	0.00950215	NS	NS	NS	NS	0.645533	0.000190251
ENSSSCG00000015328	SGCE	0.821429	0.00351902	0.819672	0.00126009	0.9375	2.1154e-10	0.96	0.00427026	0.781609	0.000356468	0.866667	1.53047e-05
ENSSSCG00000015926	ABCB11	0.567438	3.93361e-13	0.589861	3.4982e-26	0.584246	4.6102e-22	0.590879	8.13953e-20	0.586334	2.00009e-19	0.578221	1.2213e-15
ENSSSCG00000016247	TM4SF20	0.923323	1.88164e-55	0.87963	1.54781e-28	0.852113	8.09527e-15	0.948276	6.22704e-10	0.833333	0.000103938	0.861789	3.74917e-29
ENSSSCG00000016315	SPP2	0.583017	1.32502e-155	0.5835	4.80254e-145	0.598585	6.54842e-209	0.568889	2.92919e-87	0.587451	6.3852e-181	0.585025	8.76302e-169
ENSSSCG00000016679	NA	0.7	9.93827e-05	0.724551	1.57484e-05	0.696262	2.6139e-05	0.660377	0.0096256	0.797297	2.2317e-22	0.776557	3.01929e-17
ENSSSCG00000016829	AGXT2	0.713296	1.05496e-27	0.670787	2.99025e-21	0.694868	1.24081e-22	0.626621	6.90557e-19	0.72118	1.6663e-14	0.672414	3.45685e-07
ENSSSCG00000016886	NA	NS	NS	NS	NS	NS	NS	NS	NS	1	1.3124e-09	1	3.34239e-10
ENSSSCG00000016982	NA	1	1.19665e-18	1	6.93188e-26	1	9.28316e-24	1	1.39117e-25	1	7.28529e-26	1	4.74983e-24
ENSSSCG00000017226	FADS6	0.600279	0.000243103	0.572336	3.21745e-08	0.581134	6.44076e-10	0.645361	2.81427e-16	0.547563	0.0385791	0.652482	1.16896e-09
ENSSSCG00000017608	NA	0.633333	4.7439e-05	0.576281	6.05374e-07	NS	NS	0.597911	0.000183418	NS	NS	0.571716	1.54256e-11
ENSSSCG00000020842	TAF13	1	0.0215569	1	1.95115e-11	1	4.2811e-05	0.980392	1.27264e-10	1	2.6878e-06	1	1.09524e-05
ENSSSCG00000021040	SLC26A11	NS	NS	0.697115	3.50589e-05	0.663415	0.00957895	NS	NS	0.650862	0.0145604	NS	NS
ENSSSCG00000021208	SELENOP	0.562769	1.32054e-84	0.549107	2.43806e-48	0.561551	9.15147e-72	0.524721	4.82269e-19	0.610362	2.26837e-182	0.634937	2.4936e-273
ENSSSCG00000021325	NA	0.999014	0	0.998251	0	NS	NS	NS	NS	NS	NS	NS	NS
ENSSSCG00000021355	SOD1	NS	NS	NS	NS	0.612491	6.42263e-13	0.594203	3.31563e-13	NS	NS	NS	NS
ENSSSCG00000021374	FXYD1	0.623269	1.27645e-12	0.577049	5.29775e-06	0.573107	3.29946e-05	0.578223	1.19589e-06	0.592742	3.20037e-11	0.614827	1.65448e-12
ENSSSCG00000021579	NAT8	0.626344	0.00355192	0.643275	1.20376e-13	NS	NS	NS	NS	0.695035	3.98207e-22	NS	NS
ENSSSCG00000021739	HSD17B12	0.663366	1.37017e-07	0.621145	0.000755378	0.647525	9.42094e-08	0.674518	9.99405e-11	0.667976	8.10475e-11	0.648607	1.09439e-10
ENSSSCG00000021847	SAA4	0.99569	1.90775e-64	1	2.08599e-61	0.997396	5.61446e-110	0.996032	1.9266e-70	1	1.83113e-113	0.997778	9.12128e-130
ENSSSCG00000021998	NA	NS	NS	0.569666	2.12978e-33	0.578995	9.31956e-53	0.575076	3.94219e-37	NS	NS	NS	NS
ENSSSCG00000022236	FOLR1	0.59614	5.01819e-09	0.581351	1.29353e-22	0.593711	1.714e-35	0.633407	1.97053e-19	0.613095	3.71129e-15	0.595634	8.74177e-40
ENSSSCG00000022724	NA	NS	NS	NS	NS	NS	NS	0.993601	0	0.99115	1.28356e-281	0.989922	8.59729e-245
ENSSSCG00000022738	NA	0.647495	2.01821e-08	0.743421	4.17678e-06	0.605653	2.6597e-05	0.632353	1.92593e-06	0.755556	6.23221e-06	0.694444	0.000564135
ENSSSCG00000023247	OPTN	0.68595	1.51988e-20	0.669737	1.31123e-17	NS	NS	NS	NS	NS	NS	0.643008	3.50436e-15
ENSSSCG00000023305	NA	NS	NS	1	2.01744e-36	NS	NS	NS	NS	0.993289	1.21324e-39	NS	NS
ENSSSCG00000023320	CYP3A39	0.679877	7.39631e-252	0.557889	1.98617e-34	0.660007	0	0.668413	1.7453e-238	0.69372	0	0.55741	1.20213e-66
ENSSSCG00000023331	NA	NS	NS	0.605517	4.02572e-05	NS	NS	NS	NS	0.606469	2.09454e-05	0.605651	5.2781e-06
ENSSSCG00000023333	FCN2	NS	NS	NS	NS	0.564458	0.000474435	0.699812	1.06942e-150	0.5604	0.0199134	0.722459	7.07177e-145
ENSSSCG00000023585	SERINC2	0.645367	0.000854875	NS	NS	NS	NS	0.692042	1.57328e-07	NS	NS	NS	NS
ENSSSCG00000023684	MT1A	NS	NS	0.752408	0	0.859672	0	0.838741	2.13352e-109	0.751343	0	NS	NS
ENSSSCG00000023686	TTR	0.537699	8.01717e-30	0.539524	2.86819e-33	0.539663	2.42012e-31	NS	NS	NS	NS	NS	NS
ENSSSCG00000024029	NA	0.876984	4.46736e-33	0.776567	5.95322e-24	0.734637	6.59264e-16	0.689655	2.87377e-08	0.865546	2.30681e-44	0.792291	3.94887e-35
ENSSSCG00000024402	NA	0.543108	3.05547e-41	0.575596	2.30304e-168	0.572278	4.0062e-151	0.567843	4.36775e-153	0.544978	3.4474e-48	0.54496	9.70312e-43
ENSSSCG00000024911	NA	NS	NS	0.60531	4.2815e-80	0.701248	1.14478e-288	0.669702	1.406e-82	0.578164	6.4683e-35	NS	NS
ENSSSCG00000025192	NA	NS	NS	0.718593	1.24489e-49	NS	NS	0.685349	2.25484e-29	0.762348	3.00252e-86	NS	NS
ENSSSCG00000025582	PXDC1	0.75	4.79619e-10	0.681818	4.30965e-05	0.791209	2.88426e-12	NS	NS	0.811321	3.09202e-17	0.825	6.50909e-18
ENSSSCG00000025656	NA	NS	NS	NS	NS	NS	NS	1	2.50611e-09	1	0.0110092	1	3.18755e-16
ENSSSCG00000025748	SEBOX	0.970588	1.15126e-05	0.964286	0.00059332	0.967742	8.56221e-05	0.97561	1.05257e-07	0.975	2.15234e-07	0.98	2.66347e-10
ENSSSCG00000026025	HMGCL	0.632633	1.24284e-13	0.621331	2.25833e-11	0.62037	1.07268e-07	0.595052	0.000425047	0.603799	5.55886e-05	0.641667	7.68834e-11
ENSSSCG00000026067	TMPRSS6	0.727964	4.94631e-60	0.765421	1.44996e-72	0.77521	8.55037e-98	0.714703	8.19205e-41	0.748159	2.36546e-74	0.714715	1.82389e-53
ENSSSCG00000026761	CCT8	0.598361	2.43635e-06	0.589989	0.000106214	0.589651	0.000759344	0.60177	2.25184e-08	0.568462	0.000243386	0.593972	8.72161e-07
ENSSSCG00000028203	NA	0.586127	3.59236e-26	0.558462	8.26358e-10	0.542159	0.000446814	0.545913	2.19137e-05	0.54382	1.40717e-08	0.551004	1.18878e-12
ENSSSCG00000029945	GCAT	0.567792	2.54407e-05	0.557068	0.00183454	NS	NS	NS	NS	NS	NS	NS	NS
ENSSSCG00000030371	NA	0.589428	0	0.532132	3.59677e-40	0.716205	0	0.737221	0	0.587895	0	0.509791	0.00557391
ENSSSCG00000030938	NA	1	1.22537e-15	1	9.5271e-15	0.9375	0.00070772	1	1.8672e-17	1	5.00641e-15	1	6.52811e-13
ENSSSCG00000031053	S100A1	0.640216	1.01115e-20	NS	NS	NS	NS	NS	NS	0.593448	2.26378e-08	0.641825	1.5445e-21
ENSSSCG00000031274	F12	0.545566	5.50621e-07	NS	NS	0.542412	6.9887e-07	0.549313	1.66385e-08	NS	NS	NS	NS
ENSSSCG00000031378	NA	0.915584	7.11477e-25	1	1.29116e-34	NS	NS	0.978261	6.92934e-33	0.968992	9.6408e-29	0.974576	4.84719e-27
ENSSSCG00000031646	APOC4	NS	NS	NS	NS	0.568079	7.76808e-09	NS	NS	NS	NS	0.56876	5.60037e-11
ENSSSCG00000031919	NA	NS	NS	NS	NS	NS	NS	0.674847	2.20896e-11	0.719192	1.58119e-19	0.742574	3.24183e-14
ENSSSCG00000032213	DBI	0.564626	0.00810718	NS	NS	0.566161	0.00274263	0.561605	0.00080216	0.5835	2.9588e-07	0.586969	1.70207e-09
ENSSSCG00000032431	TMEM52B	0.919101	9.37812e-78	0.927739	6.94587e-79	0.915423	1.72594e-68	NS	NS	0.923364	2.52756e-96	NS	NS
ENSSSCG00000033727	GPX1	0.61049	1.35856e-10	0.591743	4.12789e-06	0.583238	0.00289691	0.601747	1.65466e-08	NS	NS	0.602787	1.0012e-08
ENSSSCG00000033913	C1RL	0.626582	5.77625e-07	0.625806	1.07581e-06	0.653903	2.45906e-12	0.639594	9.01833e-05	0.636471	4.48583e-12	0.652115	4.15399e-13
ENSSSCG00000034444	EIF4EBP2	0.580009	6.25729e-11	0.58059	1.82376e-11	0.574522	9.54036e-08	NS	NS	0.57227	3.45475e-08	0.570728	8.24697e-09
ENSSSCG00000034663	NA	1	1.04804e-64	1	6.51871e-63	1	1.06565e-64	1	4.34741e-27	1	2.61347e-68	0.996255	6.64513e-75
ENSSSCG00000035064	NA	0.851852	1.98717e-07	0.848214	6.88623e-11	NS	NS	NS	NS	NS	NS	NS	NS
ENSSSCG00000035293	NA	NS	NS	0.985591	0	0.948662	0	0.977378	0	0.970327	0	NS	NS
ENSSSCG00000035347	NA	0.729508	1.70712e-15	0.797337	8.67848e-54	0.92803	9.10858e-48	0.979737	0	0.934426	1.12265e-21	0.821993	1.85215e-140
ENSSSCG00000035355	F2R	0.676596	0.000184217	NS	NS	0.639676	0.0385207	0.649446	0.00271482	NS	NS	NS	NS
ENSSSCG00000035366	MFHAS1	0.978261	2.76626e-68	0.922581	3.40033e-26	0.92268	2.2723e-33	0.910569	7.27532e-40	0.902564	1.38518e-29	0.857143	1.56441e-25
ENSSSCG00000035617	NA	0.876623	2.83858e-62	0.90991	2.85963e-92	0.890511	3.56169e-60	0.903346	6.66413e-86	0.892116	1.23762e-71	0.884848	3.25216e-46
ENSSSCG00000036049	PEG10	0.997441	0	0.999552	0	0.991509	0	1	5.0392e-96	0.99886	0	0.998318	0
ENSSSCG00000036438	GPX3	0.635021	1.24564e-05	0.618018	8.1605e-05	0.698305	2.21166e-08	0.687135	1.57991e-19	0.689459	2.86567e-09	0.652174	0.000462017
ENSSSCG00000036449	G6PC	0.556994	9.03054e-12	0.617331	3.31682e-33	0.547716	2.04216e-09	0.527149	0.000400381	0.539406	6.57759e-05	0.607176	3.92372e-42
ENSSSCG00000037268	APCS	0.709924	4.45066e-24	NS	NS	0.7375	8.59351e-113	0.650831	3.8192e-32	NS	NS	NS	NS
ENSSSCG00000037324	NA	1	8.22329e-08	NS	NS	1	1.59484e-13	1	0.0052557	NS	NS	1	8.35598e-11
ENSSSCG00000037360	CST3	0.627907	1.0247e-06	0.629275	7.44729e-09	NS	NS	NS	NS	NS	NS	NS	NS
ENSSSCG00000039276	UGT2B31	1	0	1	0	1	0	0.910769	1.94924e-53	0.964384	4.68659e-169	0.972571	1.42457491064693e-312
ENSSSCG00000039480	ERLIN2	NS	NS	0.640871	1.26897e-12	0.628638	1.27384e-10	NS	NS	NS	NS	NS	NS
ENSSSCG00000040203	NA	NS	NS	0.65602	8.38915e-07	NS	NS	NS	NS	0.78022	1.07988e-37	NS	NS
ENSSSCG00000040325	NA	NS	NS	NS	NS	0.559656	2.41541e-09	0.535737	0.00313868	NS	NS	0.572219	1.15616e-19

## Sheet: Skeletal muscle
Enesmbl geneID	Gene Symbol	DLY1_ratio	DLY1_FDR	DLY2_ratio	DLY2_FDR	DLY3_ratio	DLY3_FDR	DLY4_ratio	DLY4_FDR	DLY5_ratio	DLY5_FDR	DLY6_ratio	DLY6_FDR
ENSSSCG00000000576	LDHB	NS	NS	0.933099	1.43773e-108	0.936893	5.5069e-121	0.911532	1.38461e-106	NS	NS	NS	NS
ENSSSCG00000001229	NA	0.81016	0	0.696091	2.0474e-107	0.710169	1.41293e-167	0.825095	2.70693225992959e-313	0.698057	3.55569e-139	0.683447	4.44704e-143
ENSSSCG00000002279	GPX2	0.926606	3.29971e-18	0.903226	7.68562e-08	NS	NS	NS	NS	0.954198	1.36692e-26	NS	NS
ENSSSCG00000003088	APOE	NS	NS	NS	NS	0.613583	0.00849307	NS	NS	NS	NS	0.619171	0.00884111
ENSSSCG00000003691	NA	0.68894	6.19119e-12	0.649652	1.36003e-06	0.605505	0.00262708	0.636719	1.64103e-06	0.609677	0.000148785	0.610487	0.00100291
ENSSSCG00000003693	MYOM1	0.568935	7.65318e-10	0.6076	1.08685e-23	0.568078	5.07248e-16	0.574154	3.74527e-16	0.581275	2.69868e-27	0.577818	1.05835e-24
ENSSSCG00000004110	TAB2	NS	NS	NS	NS	NS	NS	1	9.58145e-06	1	3.30212e-07	1	2.51271e-06
ENSSSCG00000004127	PLAGL1	1	1.64083e-26	1	1.43524e-13	1	6.46287e-35	0.981818	7.99538e-12	1	4.26789e-33	1	3.83409e-11
ENSSSCG00000004463	NA	NS	NS	NS	NS	NS	NS	1	0.00122643	1	8.45343e-05	1	2.51271e-06
ENSSSCG00000004834	NDN	NS	NS	NS	NS	NS	NS	1	1.03882e-24	1	3.25614e-38	0.980392	5.59117e-24
ENSSSCG00000006062	NA	1	8.24831e-114	1	1.44297e-100	1	1.03514e-179	1	2.77653e-75	0.996979	6.50578e-191	1	1.53523e-156
ENSSSCG00000006469	MRPL24	0.599388	1.34394e-06	NS	NS	NS	NS	NS	NS	0.597778	1.97073e-09	0.609983	1.6362e-16
ENSSSCG00000006470	RRNAD1	0.594624	2.25124e-05	NS	NS	NS	NS	NS	NS	0.601232	8.54045e-10	0.60986	1.29083e-15
ENSSSCG00000006829	SYPL2	0.54197	0.0108903	NS	NS	NS	NS	NS	NS	NS	NS	0.55673	5.56204e-08
ENSSSCG00000010359	NA	0.563146	8.86989e-38	0.565424	1.43411e-34	0.575726	6.89205e-70	NS	NS	0.564133	5.59411e-56	0.576612	2.23804e-85
ENSSSCG00000012061	PIGP	NS	NS	1	0.0394516	NS	NS	NS	NS	1	0.0216408	1	5.02542e-06
ENSSSCG00000014075	NA	1	1.74665e-135	1	2.49234e-177	NS	NS	NS	NS	NS	NS	NS	NS
ENSSSCG00000014540	NA	0.555684	2.46149e-26	NS	NS	NS	NS	NS	NS	0.550661	9.25079e-36	0.537254	4.91987e-19
ENSSSCG00000015328	SGCE	1	3.0268e-07	1	2.3515e-09	1	3.72559e-17	1	5.71099e-13	1	3.93643e-14	1	4.90763e-09
ENSSSCG00000016886	NA	NS	NS	NS	NS	NS	NS	NS	NS	1	6.44945e-10	1	1.91704e-11
ENSSSCG00000016982	NA	1	1.07069e-80	1	5.37547e-109	1	3.4884e-113	1	7.17716e-101	1	2.70791e-149	1	4.51164e-195
ENSSSCG00000017904	ENO3	0.522969	1.34856e-07	0.521014	0.0242605	0.523546	2.04695e-07	0.524083	7.6118e-09	0.518458	0.00371232	0.514902	0.000180536
ENSSSCG00000018005	MYH8	0.580779	8.27232e-15	0.60151	6.43075e-09	0.58568	1.23423e-11	0.567052	5.46328e-07	0.601011	6.86546e-48	0.605781	1.07811e-21
ENSSSCG00000020842	TAF13	1	1.44329e-13	1	6.84376e-20	1	5.96094e-16	1	6.64846e-23	1	2.797e-28	1	4.35885e-24
ENSSSCG00000021325	NA	1	1.16085e-99	0.997076	1.97975e-97	NS	NS	NS	NS	NS	NS	NS	NS
ENSSSCG00000023307	FBXW11	0.962963	0.0010848	1	0.000308216	NS	NS	NS	NS	NS	NS	NS	NS
ENSSSCG00000024881	TCP11L2	NS	NS	0.722922	6.5533e-16	0.749469	8.00809e-25	0.753521	4.06967e-23	0.74537	1.23462e-33	0.743341	2.47838e-20
ENSSSCG00000025192	NA	NS	NS	0.738193	1.62561e-98	NS	NS	0.724521	5.99287e-72	0.757343	4.00367e-132	NS	NS
ENSSSCG00000029441	MYH2	0.543699	2.41443e-50	0.549753	1.20993e-79	0.541095	2.218e-69	0.554074	1.45792e-105	0.544695	1.29337e-72	0.539831	1.34636e-62
ENSSSCG00000029651	SLN	NS	NS	NS	NS	0.53085	6.4627e-15	NS	NS	NS	NS	0.527645	2.83382e-12
ENSSSCG00000030113	SHISA2	NS	NS	0.625912	1.04402e-05	NS	NS	NS	NS	0.632867	1.8231e-11	0.622921	3.17585e-05
ENSSSCG00000033727	GPX1	0.943548	1.95542e-23	0.905172	5.45219e-17	0.944	1.0945e-23	0.959016	2.09337e-25	NS	NS	0.976608	6.34999e-41
ENSSSCG00000034364	NA	0.666667	0.00338741	0.732484	1.25414e-05	0.765182	6.09323e-14	0.746032	6.39122e-12	0.683292	4.69777e-10	0.806452	1.5007e-22
ENSSSCG00000034663	NA	1	2.07102e-55	1	6.43584e-57	1	8.23675e-92	1	1.47626e-38	0.994778	2.11753e-107	1	6.94406e-82
ENSSSCG00000035223	SYNM	0.6875	0.00620935	0.764706	6.80076e-09	0.711599	7.05462e-11	NS	NS	NS	NS	NS	NS
ENSSSCG00000035293	NA	NS	NS	0.982154	0	0.984464	0	0.987417	0	0.96456	0	NS	NS
ENSSSCG00000035805	DLK1	0.980144	3.07823e-141	0.992188	1.96031e-33	0.97931	6.26487e-35	0.979003	1.09141e-95	0.980551	6.07175e-158	1	6.71588e-57
ENSSSCG00000036049	PEG10	1	1.80599e-160	1	8.20231e-114	1	8.5166e-117	1	8.55584e-108	1	5.31736e-239	1	2.49106e-124
ENSSSCG00000036402	MYL9	NS	NS	NS	NS	0.589602	0.000218134	0.651163	0.00352944	0.62614	1.30546e-16	0.639687	2.55519e-11
ENSSSCG00000038399	NA	0.649123	9.07697e-22	0.653502	3.04908e-26	0.67128	2.3221e-28	0.655091	3.11719e-25	NS	NS	0.65423	2.36748e-38
ENSSSCG00000040461	NA	0.958333	0.0077486	NS	NS	NS	NS	NS	NS	0.90625	0.00725014	0.958333	0.00804067
ENSSSCG00000040507	PDLIM7	0.57	0.00357898	NS	NS	0.563144	0.0019772	0.58829	1.96404e-05	NS	NS	NS	NS
