# Supplementary material for: Genomic analyses provide insights into breed-of-origin effects from purebreds on three-way crossbred pigs
Source: PeerJ journal article supplement (doi:10.7717/peerj.8009), 2019-11-11
Supplement: Supplementary.pdf [file Supplementary.pdf]

# Supplementary Figures and Tables

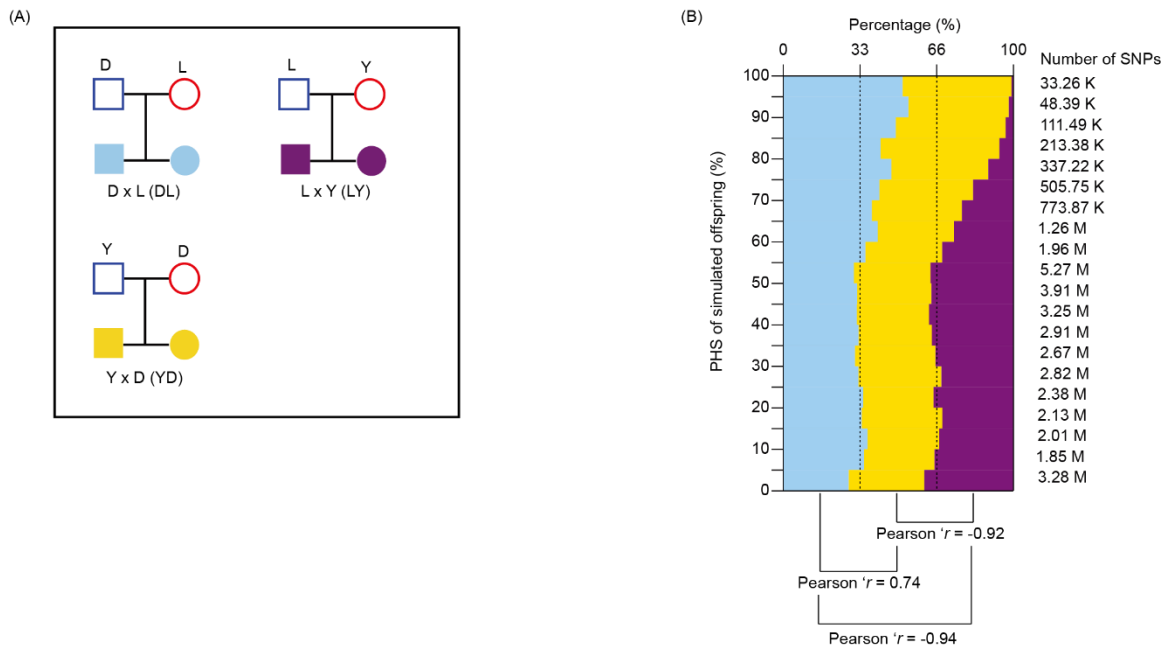

**Figure S1. Distribution of heterozygous SNPs in two-way crossbreeding offspring.** **A** Simulation of three kinds of two-way crossbreeding. **B** Distribution of SNP number of the simulated offspring of three kinds of two-way crossbreeding systems for 20 equal intervals (based on PHS, from 0% to 100%, with intervals of 5%). Pearson  $r$  was inferred between each two kinds of two-way crossbreeding systems.

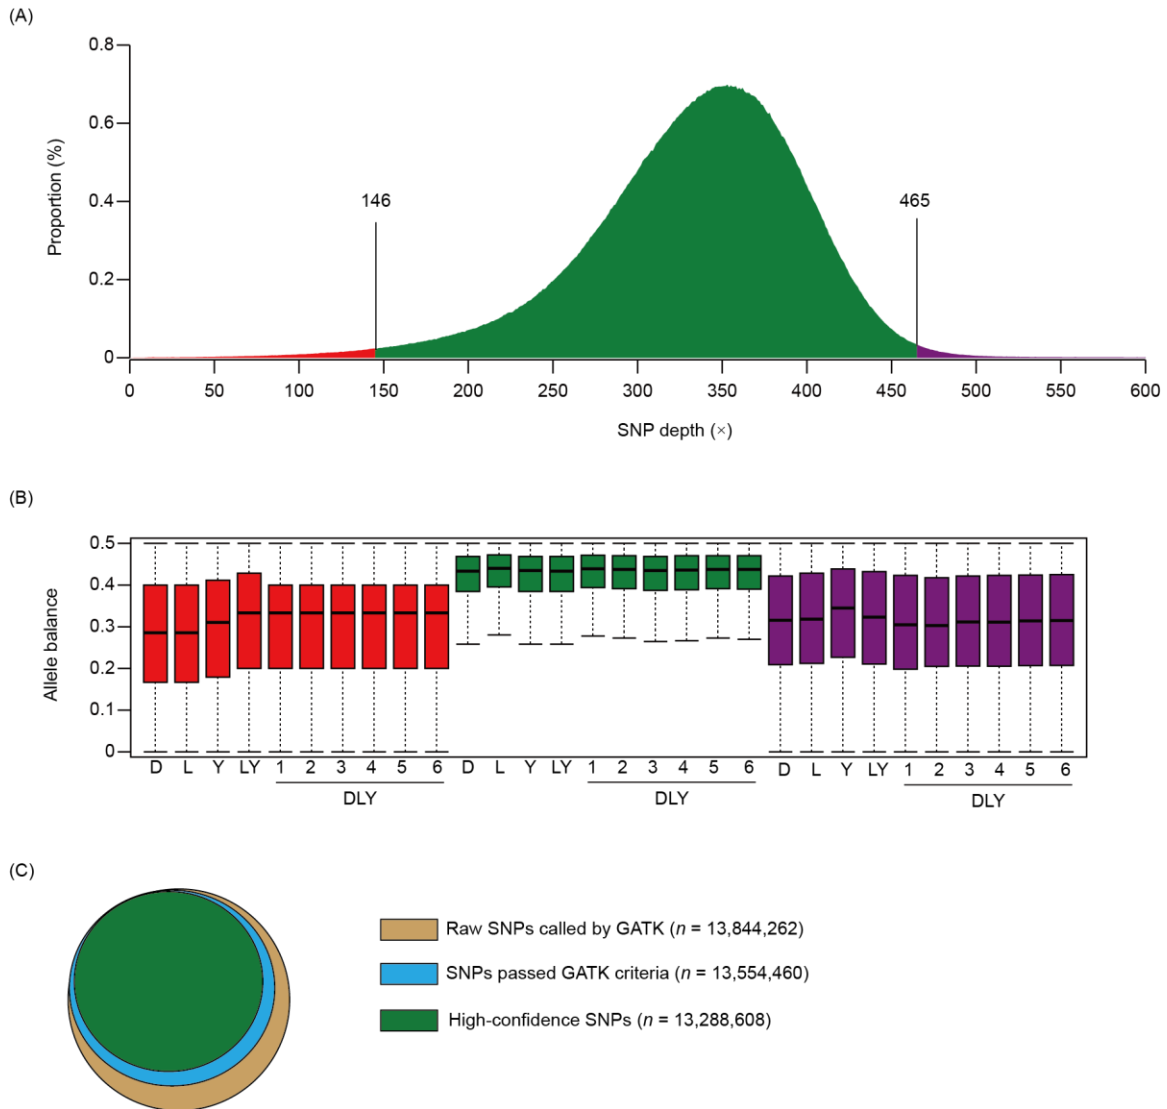

**Figure S2. The pipeline of depleting low-confidence SNPs.** (A) The distribution of SNP depth of the sequenced DLY pig family. We empirically depleted ~1% SNPs located in left tail (SNP depth < 146, marked in red) and right tail (SNP depth > 465, marked in purple). (B) The distribution of allele balance for left tail SNPs (red), high-confidence SNPs (green) and right tail SNPs (purple) of ten sequenced pigs. (C) The number of raw SNPs called by GATK ( $n = 13,844,262$ ), SNPs passed GATK criteria ( $n = 13,554,460$ ) and high-confidence SNPs ( $n = 13,288,608$ ).

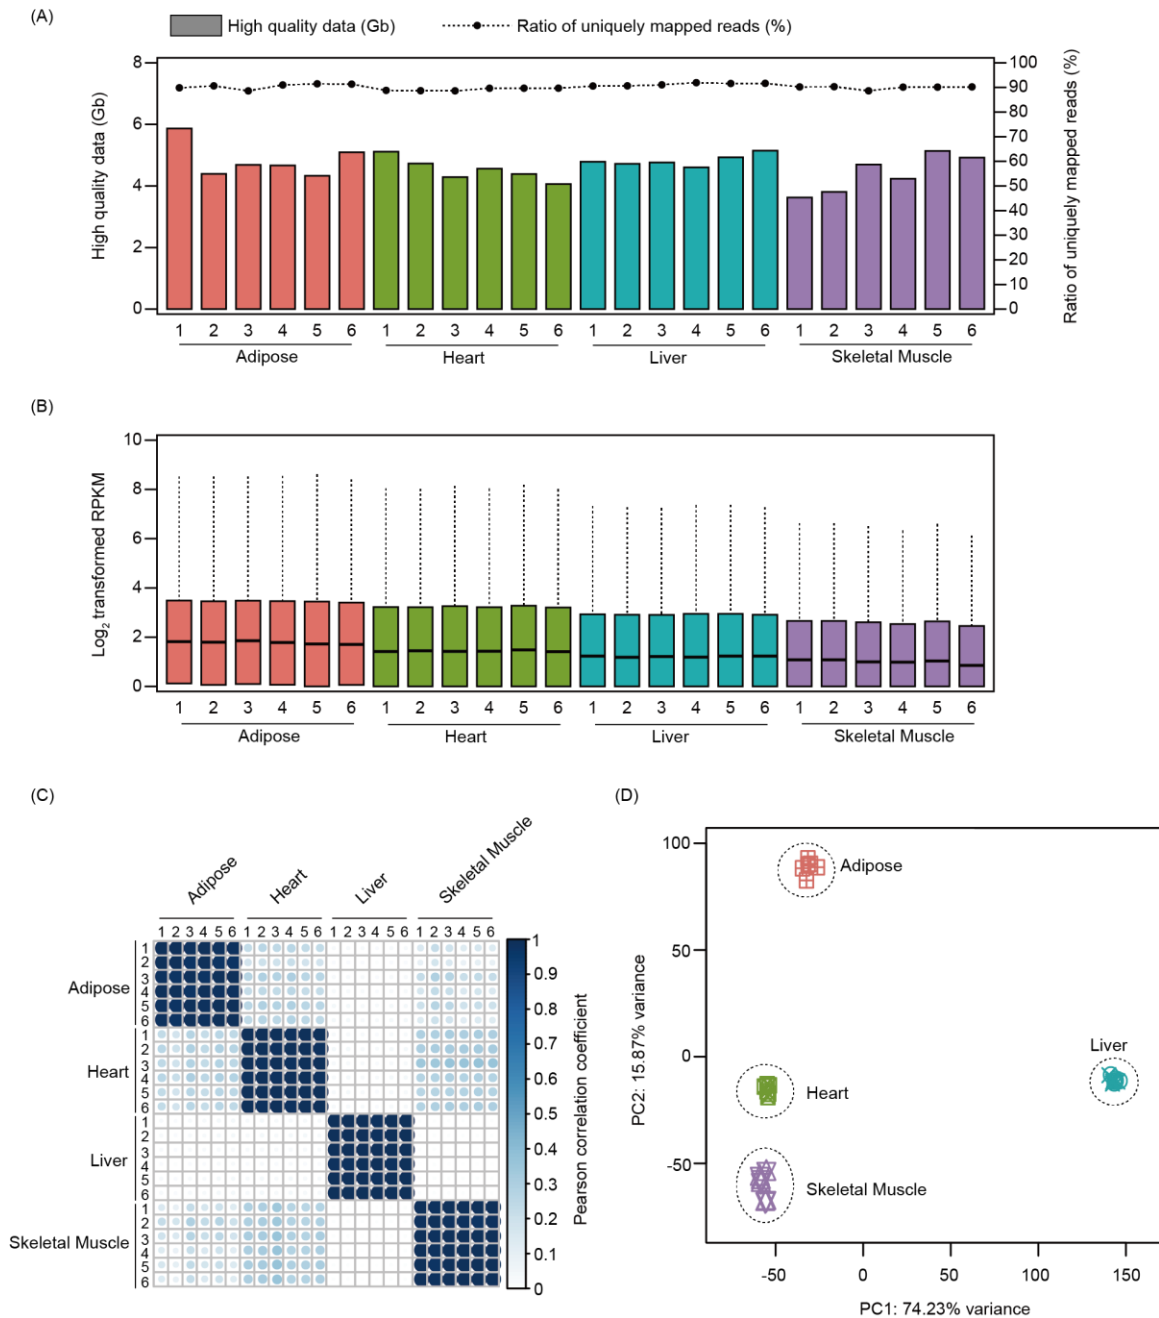

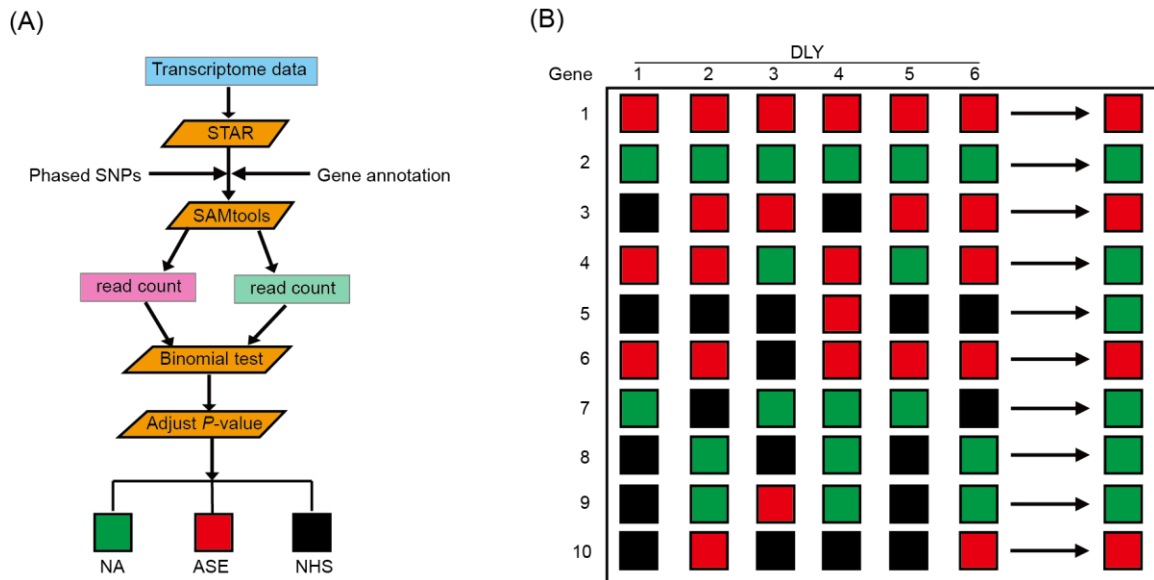

**Figure S4. The pipeline of ASE genes identification.** (A) The process of mapping, binomial test and classification. Transcriptome data were mapped with STAR and the total number of reads for each gene aligning to different alleles were counted by SAMtools. Each gene was classified to three categories, including ASE (adjust- $P < 0.05$ , binomial test), NA (not significant for allele-specific expression) and NHS (no heterozygous SNP). (B) The principle of ASE identification: more than two DLY individuals harbor phased exonic SNPs and are all ASE categories.

(A)

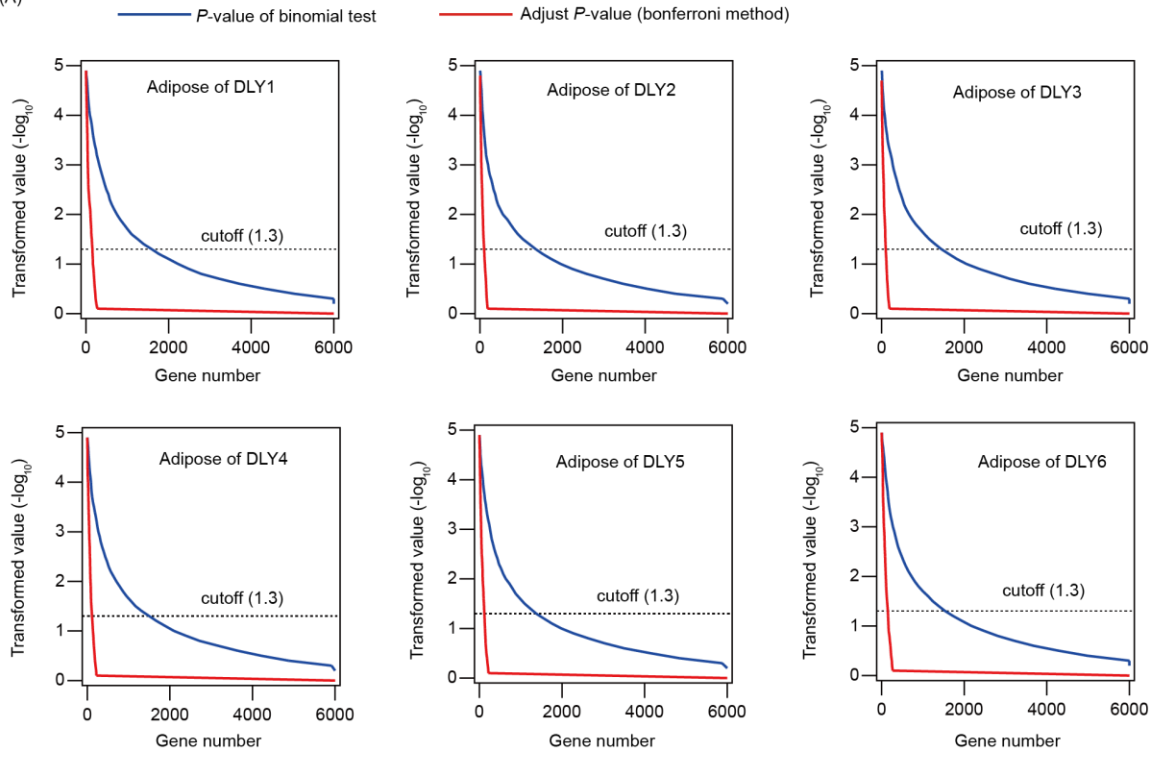

(B)

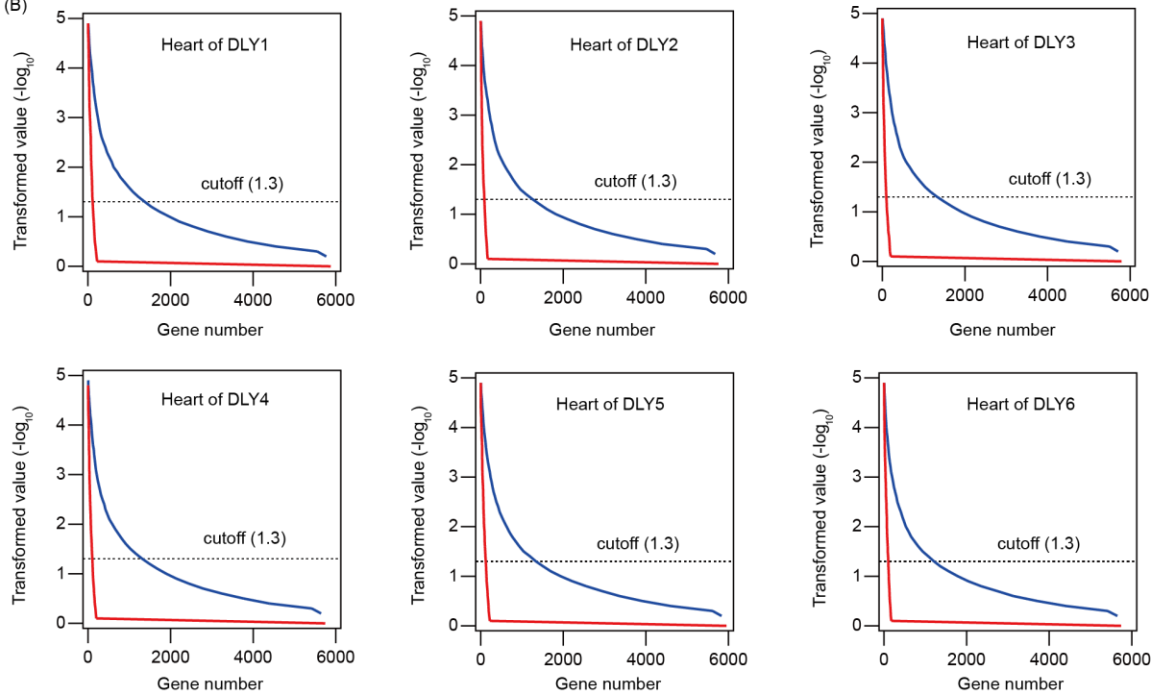

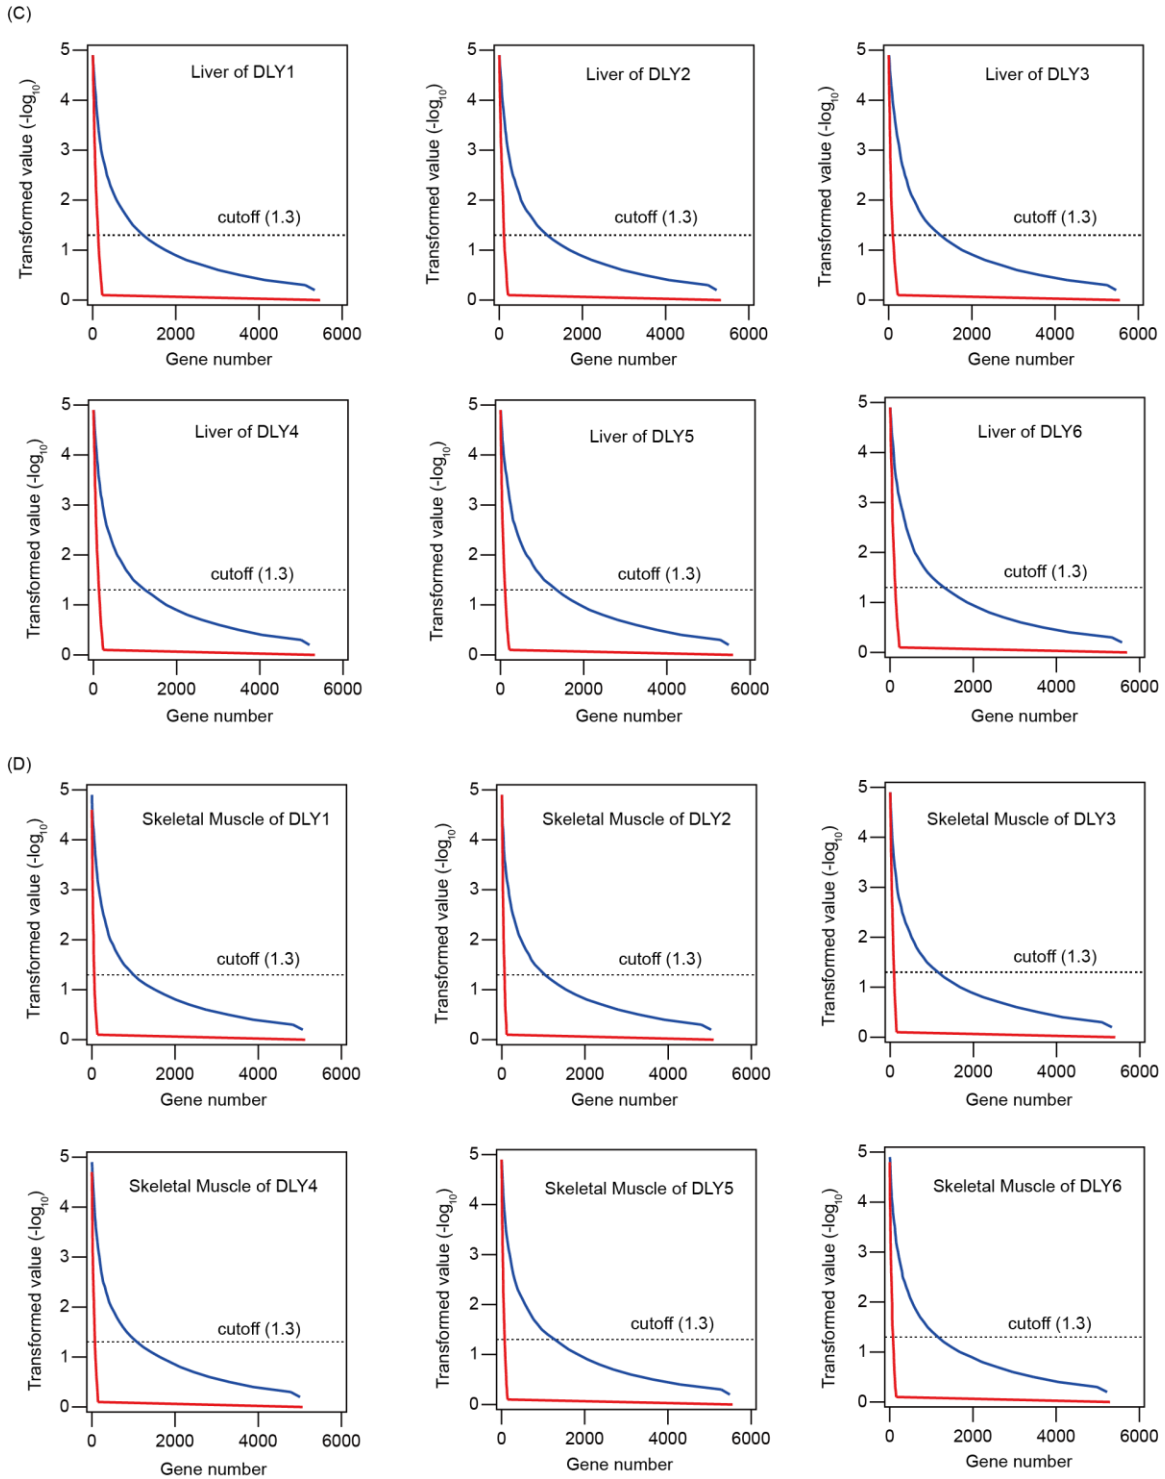

**Figure S5. *P*-value adjustment using Bonferroni method.** The *P*-values calculated by binomial test were adjusted using bonferroni method for adipose (A), heart (B), liver (C) and skeletal muscle (D).

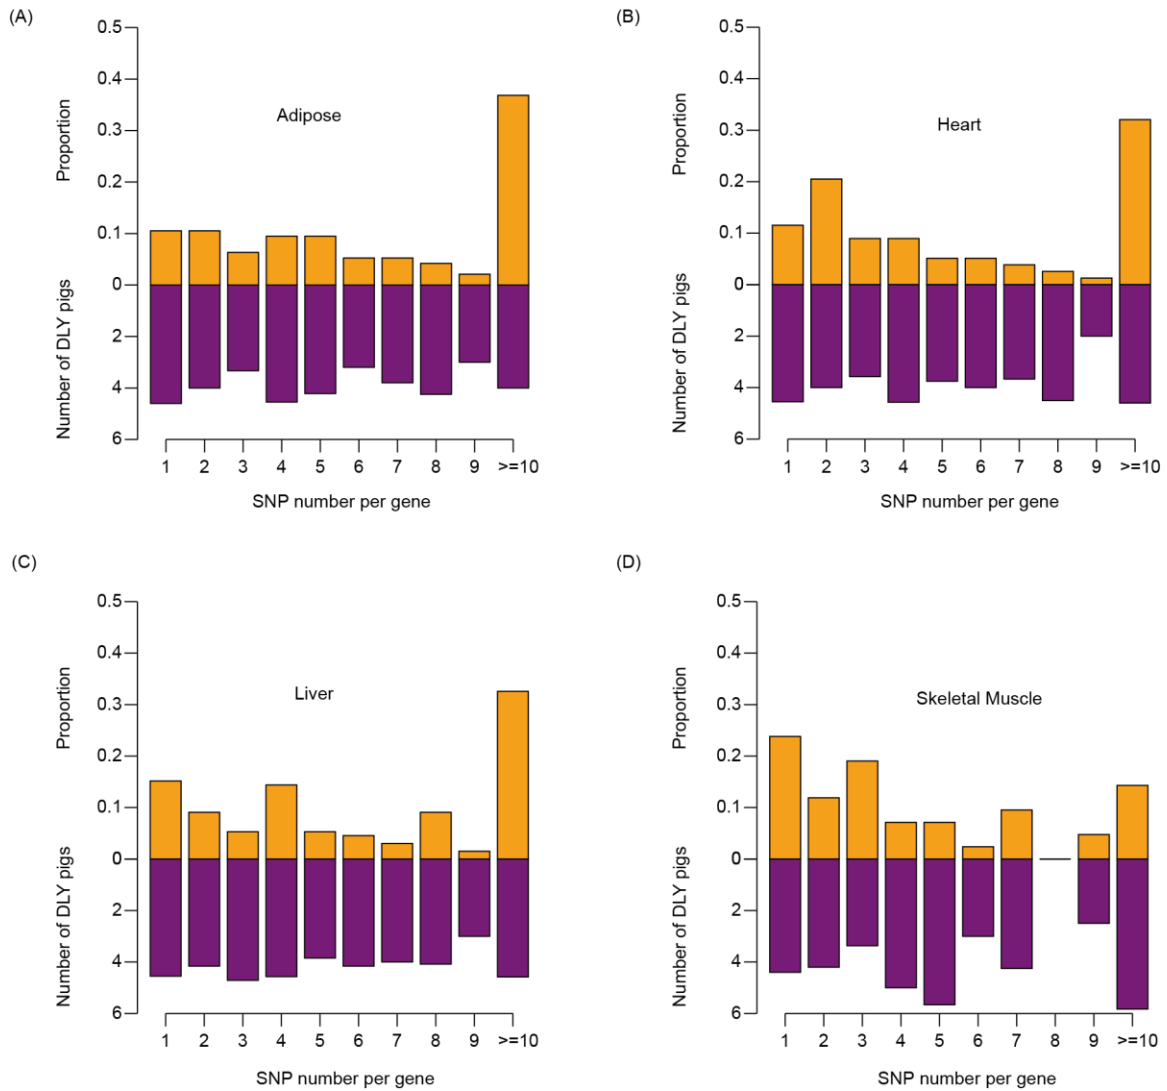

**Figure S6. The Statistics of SNP number for ASE genes.** For each ASE gene, the proportion (marked in orange) and the number of DLY pigs (marked in purple) for each rank of average SNP number (keep integer) were calculated for adipose (A), heart (B), liver (C) and skeletal muscle (D).

>Ensembl GeneID: ENSSSCG00000004834

>Gene Symbol: **NDN**

>Tissue of ASE pattern: Adipose, Heart, Liver, Skeletal Muscle (Known imprinted gene)

SNP locus: Chr1: 142412685

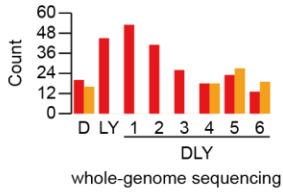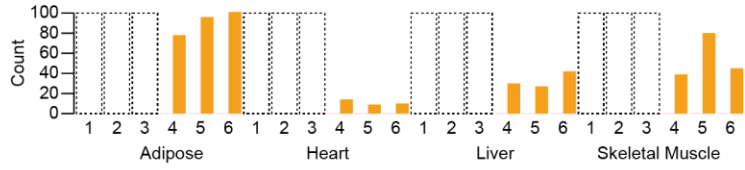

>Ensembl GeneID: ENSSSCG000000037158

>Gene Symbol: **MTURN**

>Tissue of ASE pattern: Adipose

SNP locus: Chr18: 42801778

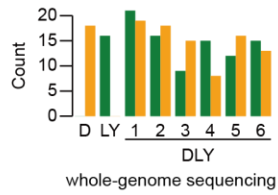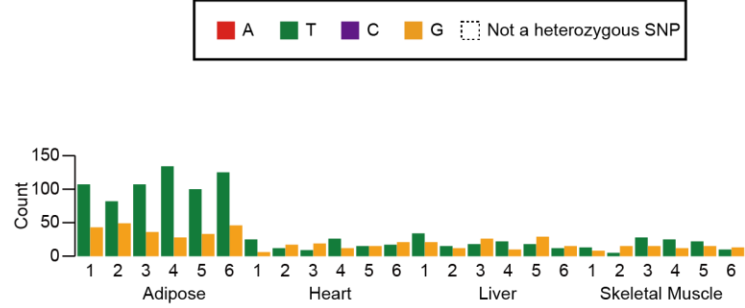

>Ensembl GeneID: ENSSSCG000000038399

>Gene Symbol: **ATP5PF**

>Tissue of ASE pattern: Adipose, Heart, Skeletal Muscle

SNP locus: Chr13: 189281509

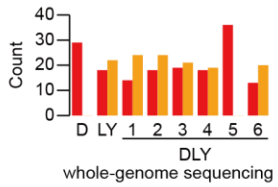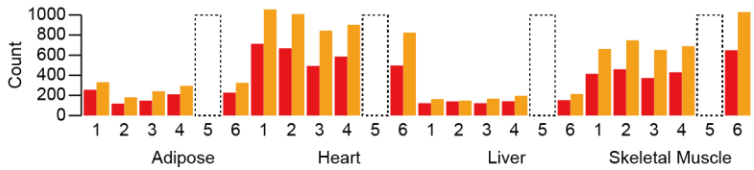

>Ensembl GeneID: ENSSSCG00000003465

>Gene Symbol: **FBLIM1**

>Tissue of ASE pattern: Adipose

SNP locus: Chr6: 74961704

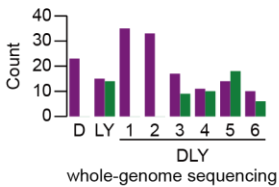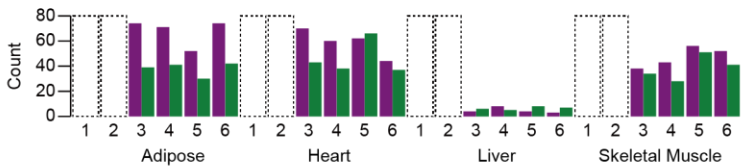



>Ensembl GeneID: ENSSSCG00000003088  
 >Gene Symbol: **APOE**  
 >Tissue of ASE pattern: Adipose, Liver, Skeletal Muscle  
 SNP locus: Chr6: 51373946

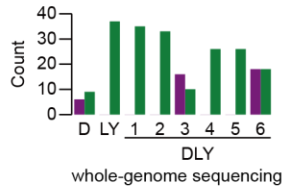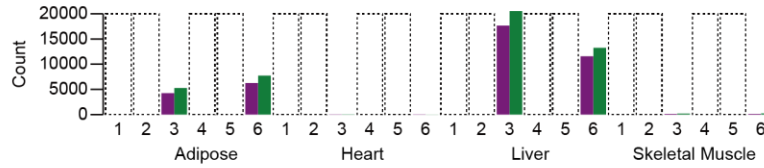

>Ensembl GeneID: ENSSSCG00000002349  
 >Gene Symbol: **ACOT4**  
 >Tissue of ASE pattern: Adipose, Heart  
 SNP locus: Chr7: 96872639

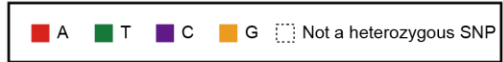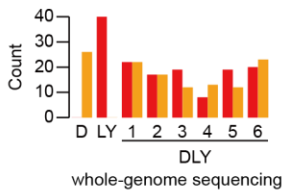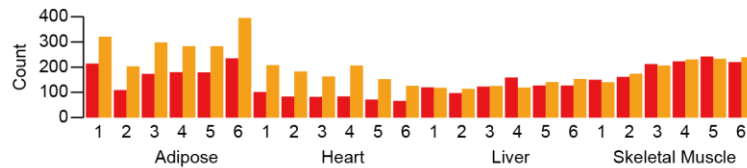

>Ensembl GeneID: ENSSSCG00000002306  
 >Gene Symbol: **GALNT16**  
 >Tissue of ASE pattern: Adipose  
 SNP locus: Chr7: 93040969

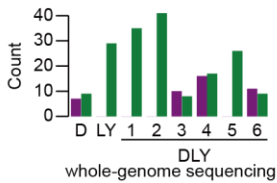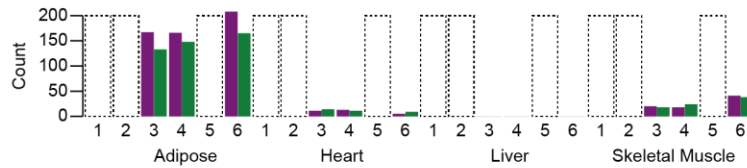

>Ensembl GeneID: ENSSSCG00000001780  
 >Gene Symbol: **FAH**  
 >Tissue of ASE pattern: Adipose, Liver  
 SNP locus: Chr7: 49071083

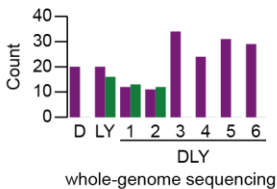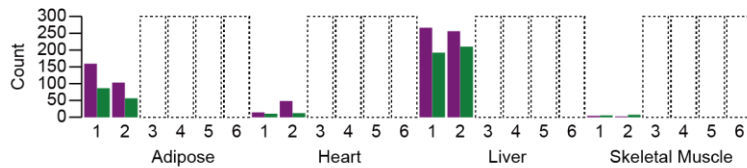

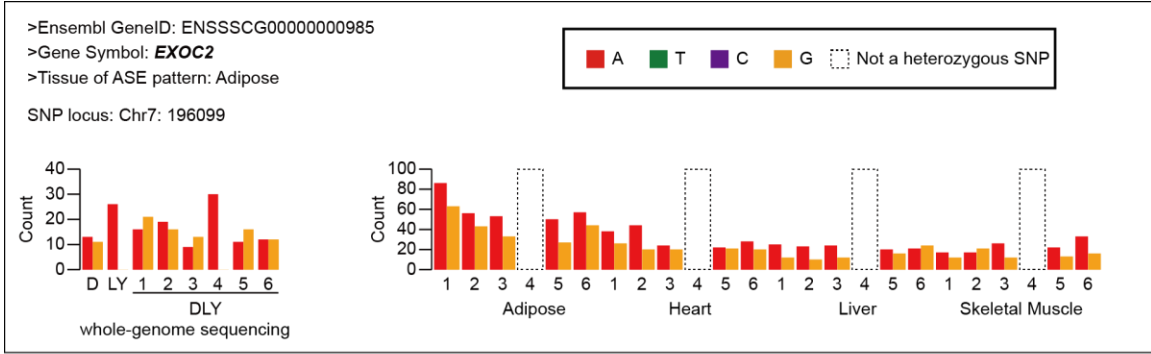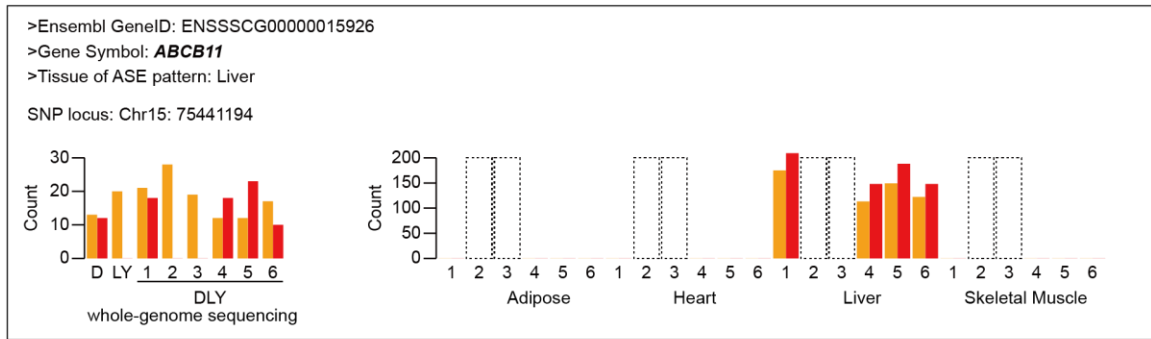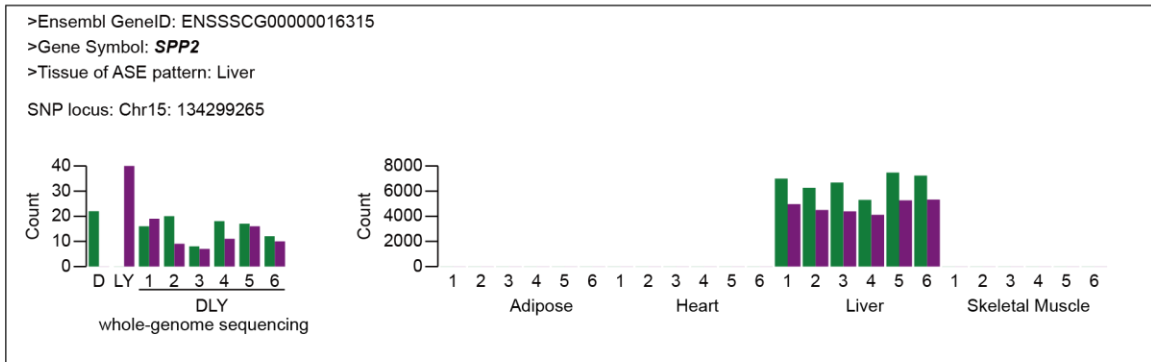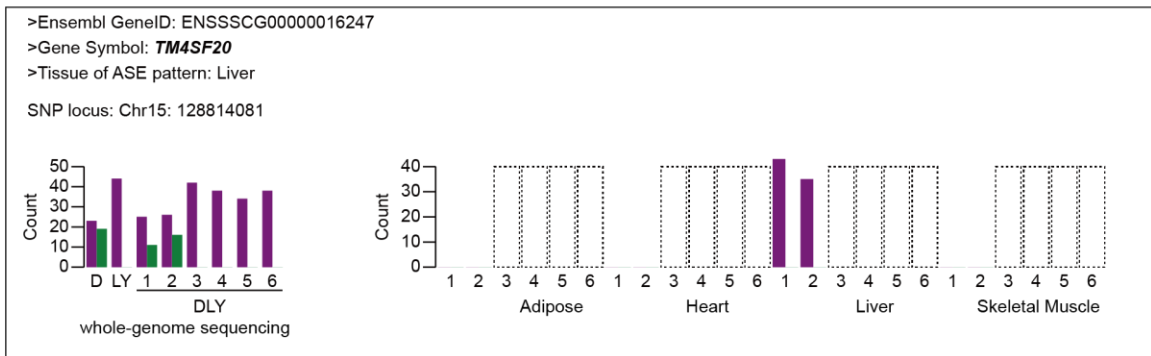

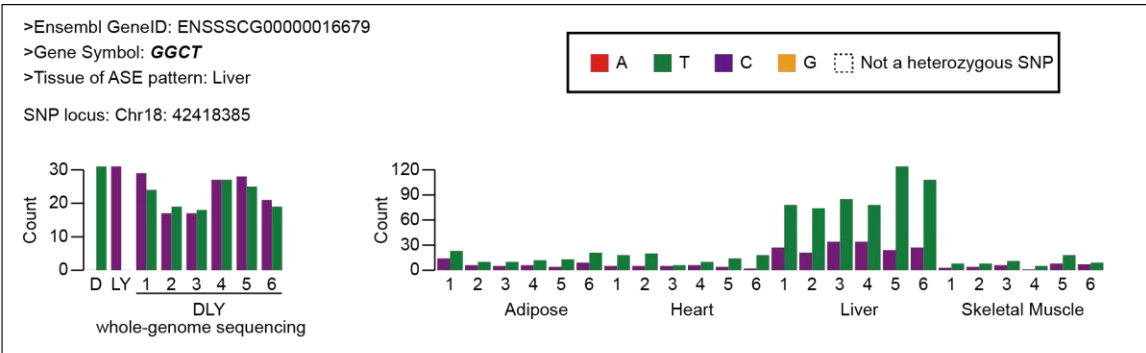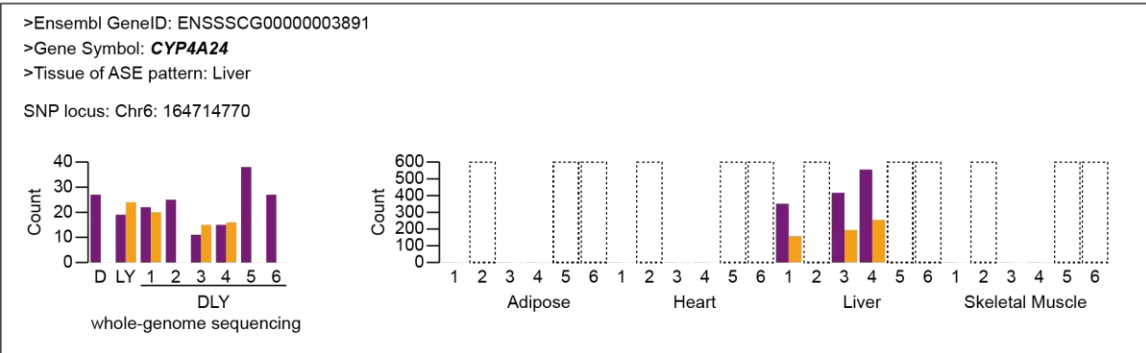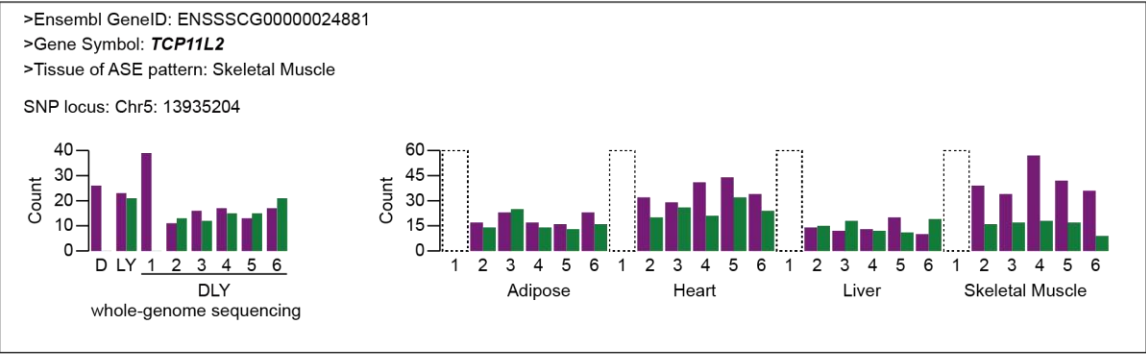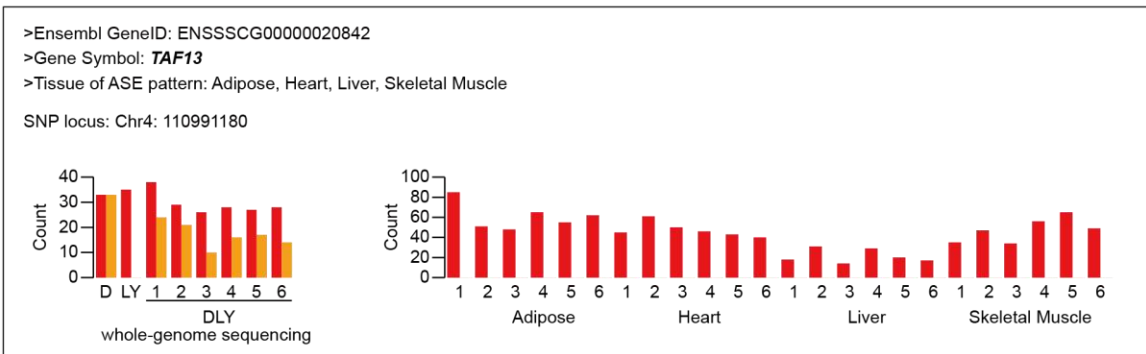

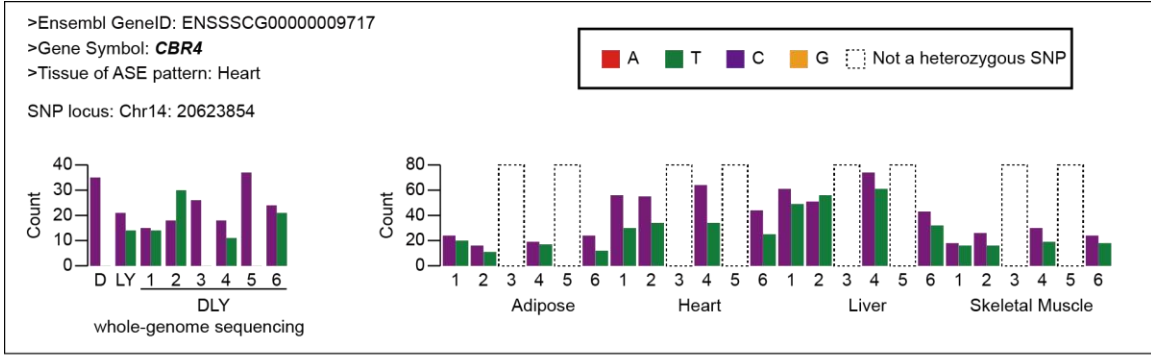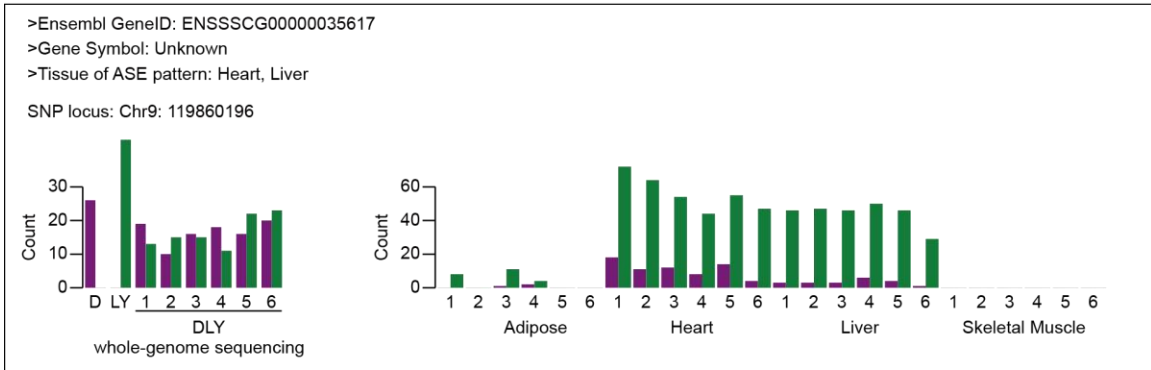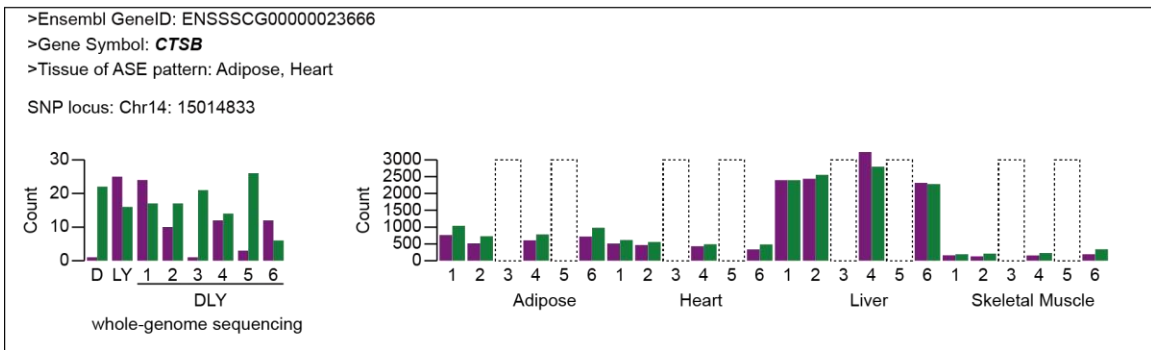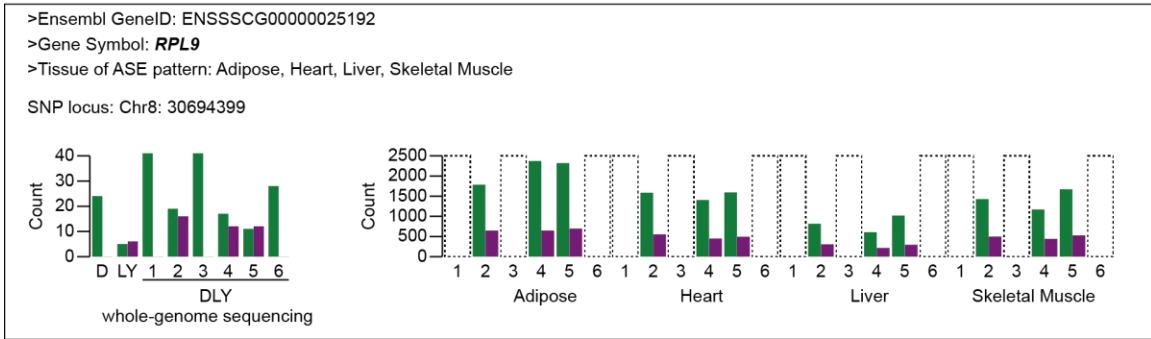

>Ensembl GeneID: ENSSSCG00000016982

>Gene Symbol: **BOD1**

>Tissue of ASE pattern: Adipose, Heart, Liver, Skeletal Muscle

SNP locus: Chr16: 50741566

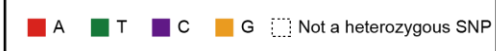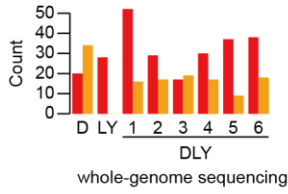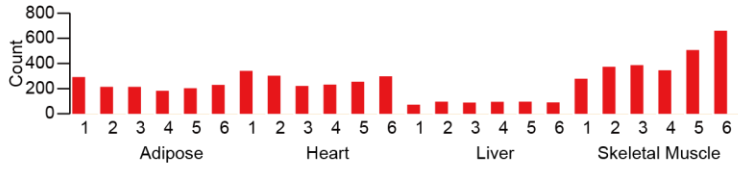

>Ensembl GeneID: ENSSSCG00000021325

>Gene Symbol: **MCFD2**

>Tissue of ASE pattern: Adipose, Heart, Liver, Skeletal Muscle

SNP locus: Chr3: 93631882

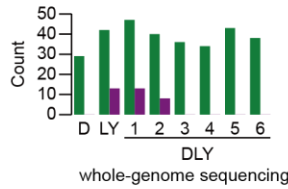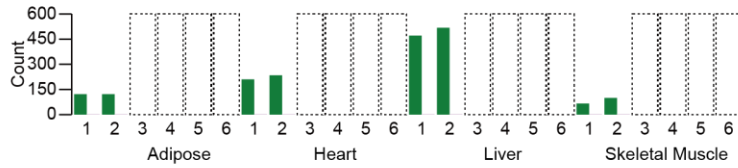

>Ensembl GeneID: ENSSSCG00000006469

>Gene Symbol: **MRPL24**

>Tissue of ASE pattern: Heart, Liver, Skeletal Muscle

SNP locus: Chr4: 93356393

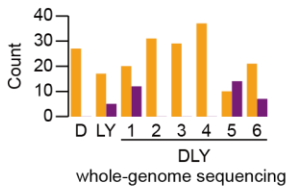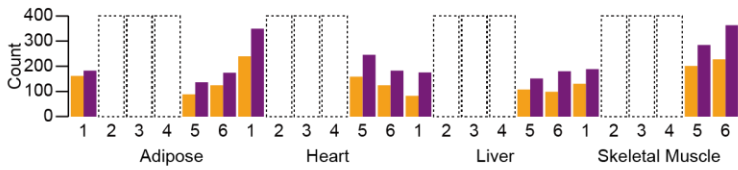

>Ensembl GeneID: ENSSSCG00000030113

>Gene Symbol: **SHISA2**

>Tissue of ASE pattern: Skeletal Muscle

SNP locus: Chr11: 3807493

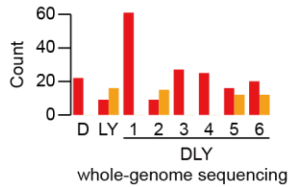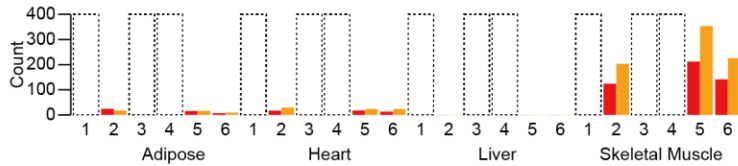

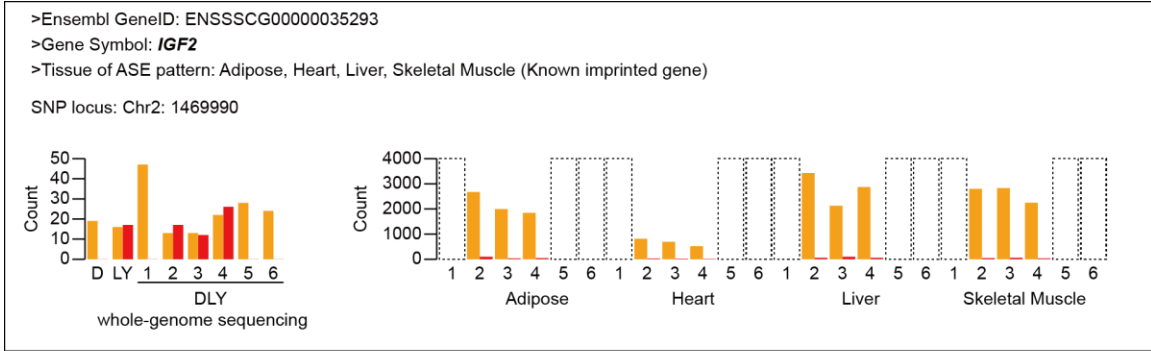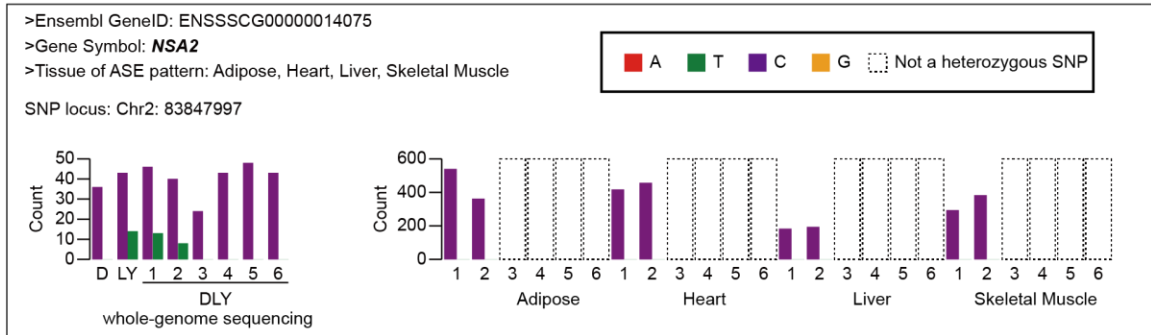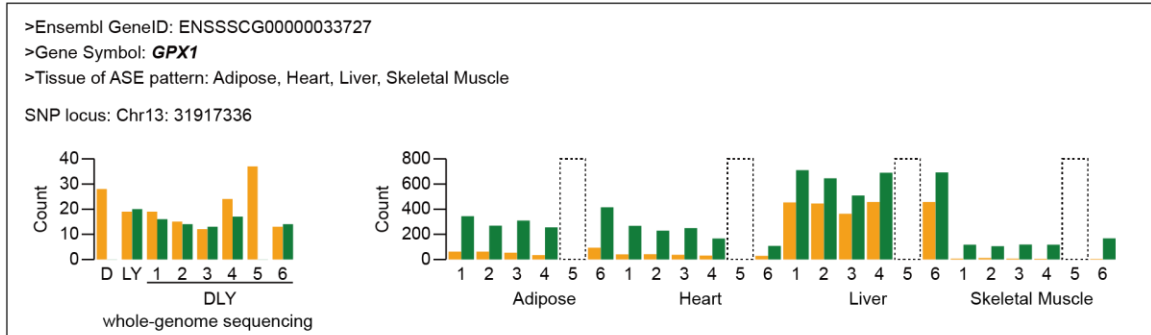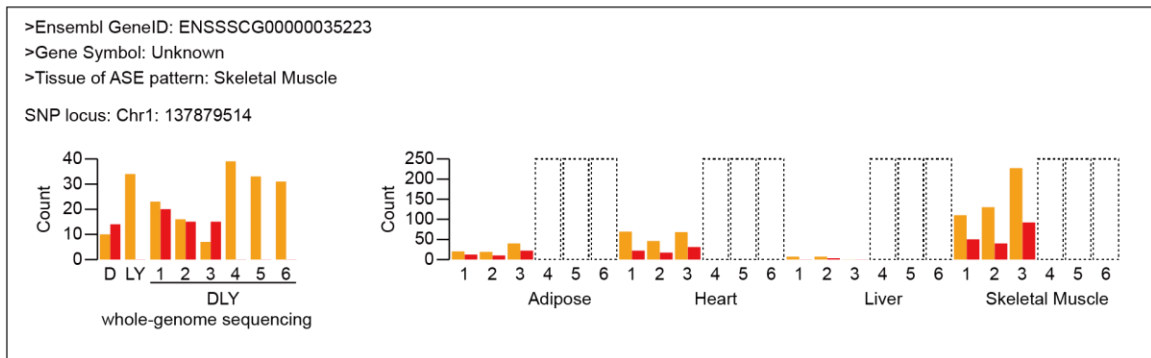

>Ensembl GeneID: ENSSSCG00000015328  
 >Gene Symbol: **SGCE**  
 >Tissue of ASE pattern: Adipose, Heart, Liver, Skeletal Muscle  
 SNP locus: Chr9: 74432929

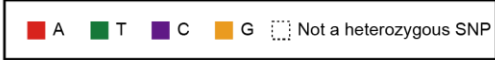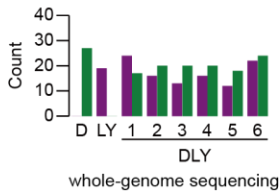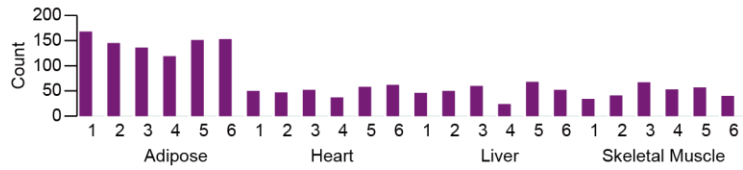

>Ensembl GeneID: ENSSSCG00000006062  
 >Gene Symbol: **YWHAZ**  
 >Tissue of ASE pattern: Adipose, Heart, Liver, Skeletal Muscle  
 SNP locus: Chr4: 36004817

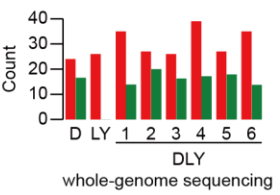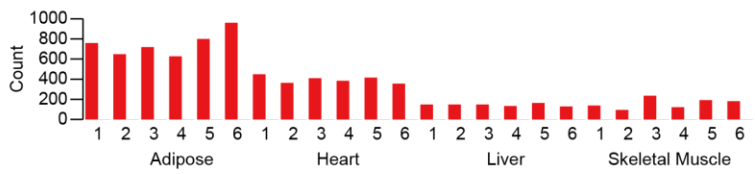

>Ensembl GeneID: ENSSSCG00000002623  
 >Gene Symbol: **GSTA1**  
 >Tissue of ASE pattern: Liver  
 SNP locus: Chr7: 46539031

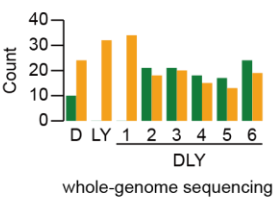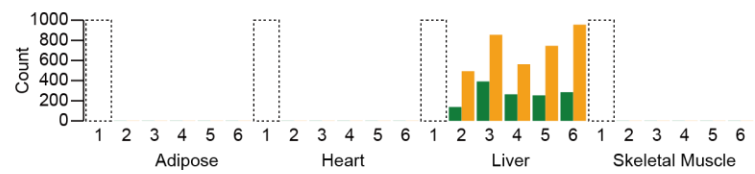

>Ensembl GeneID: ENSSSCG00000006702  
 >Gene Symbol: **FMO5**  
 >Tissue of ASE pattern: Liver  
 SNP locus: Chr4: 100371933

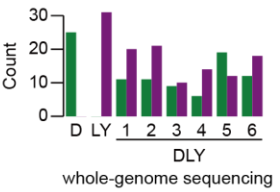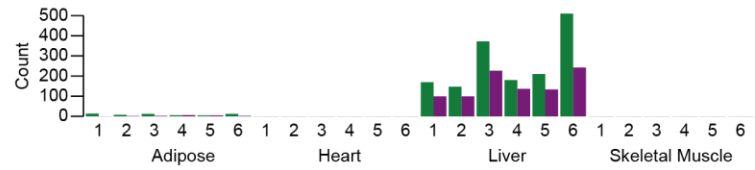

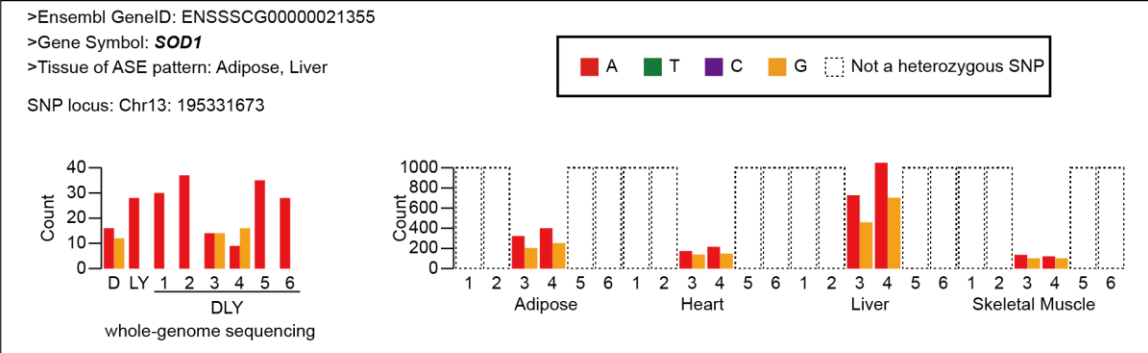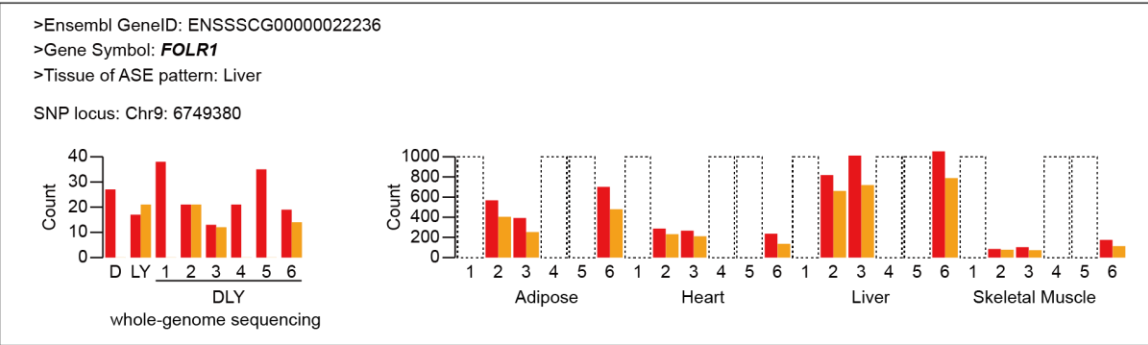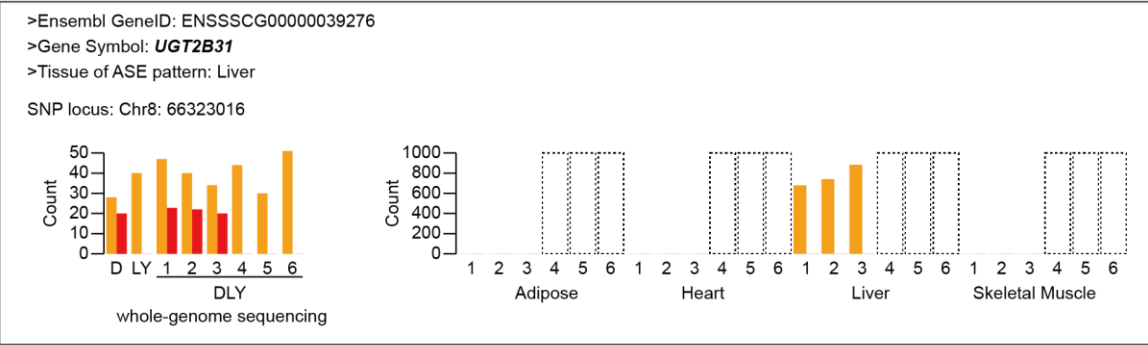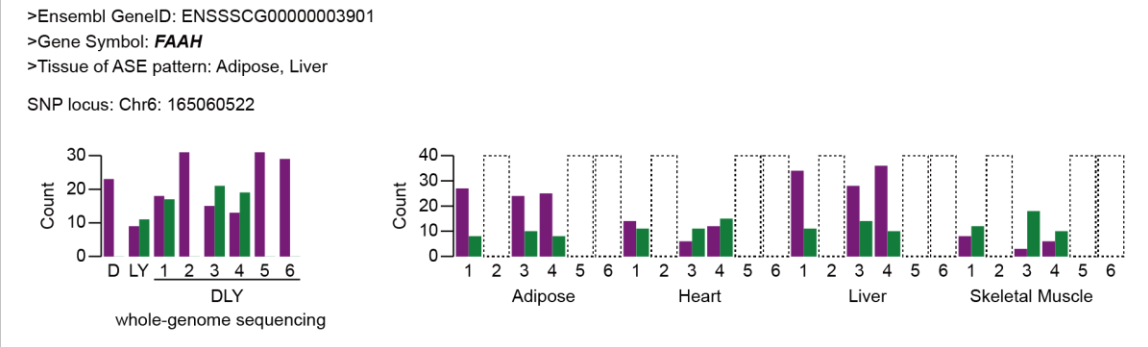



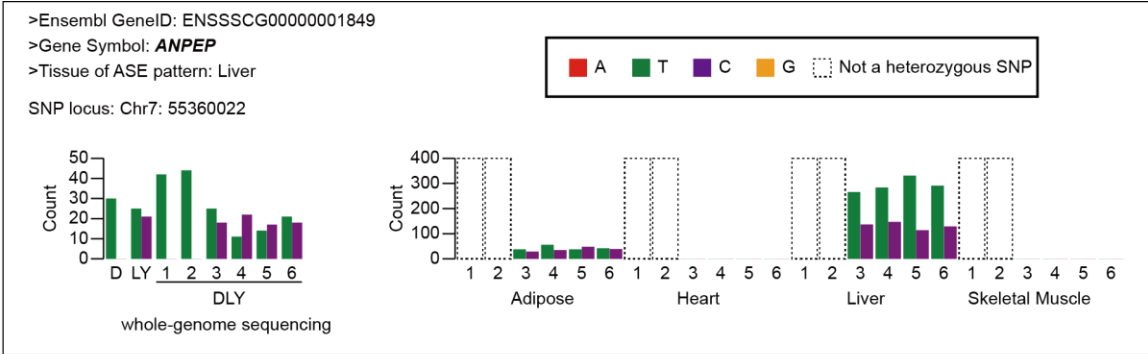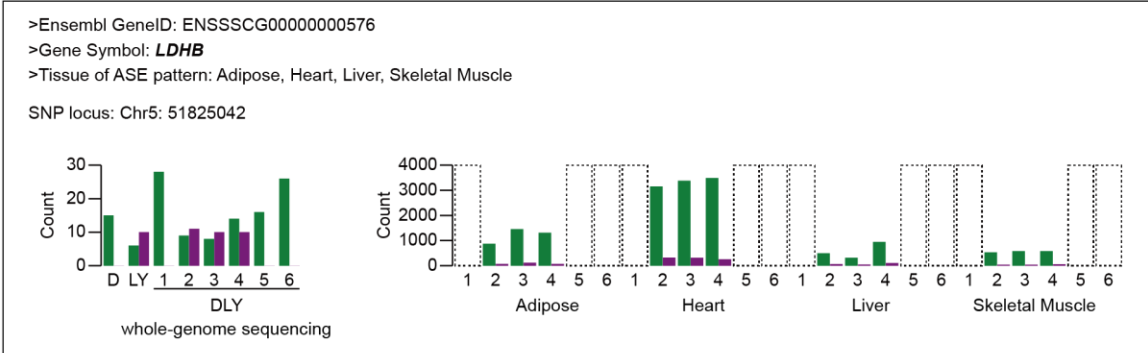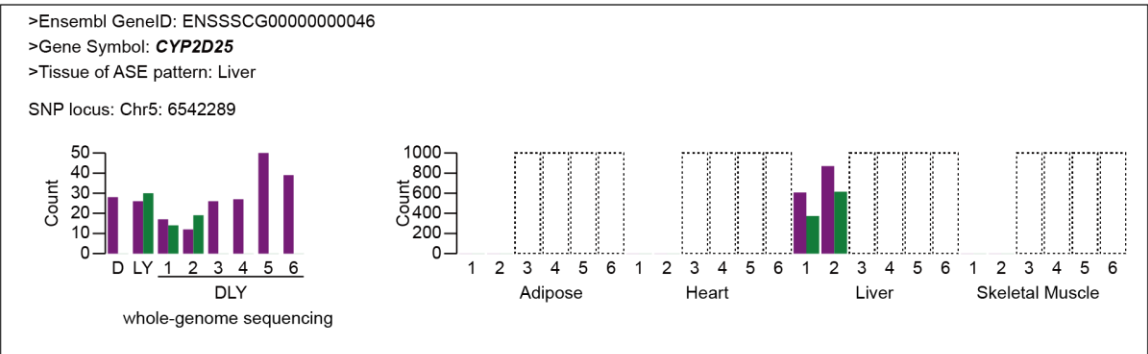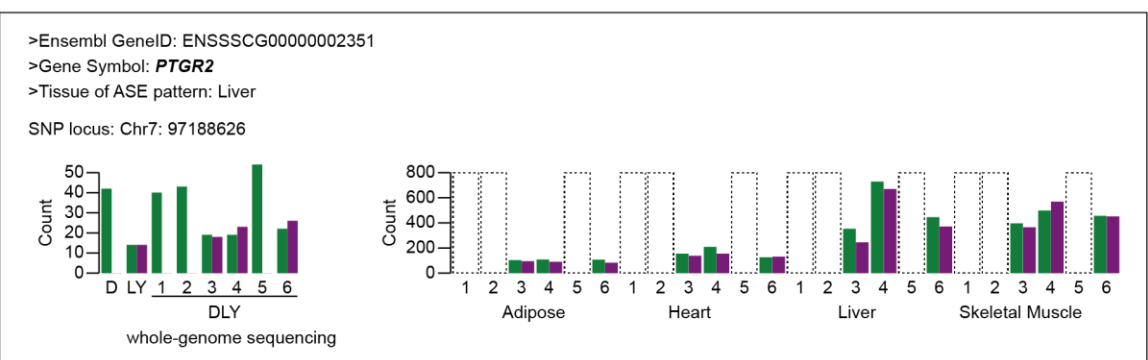

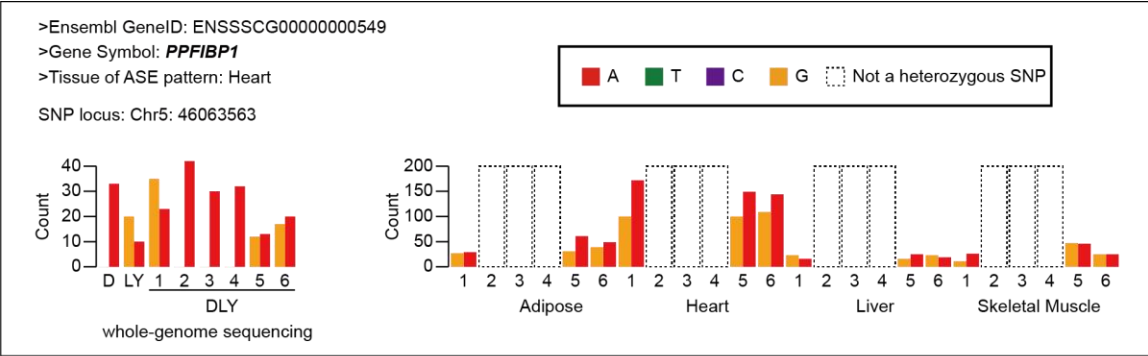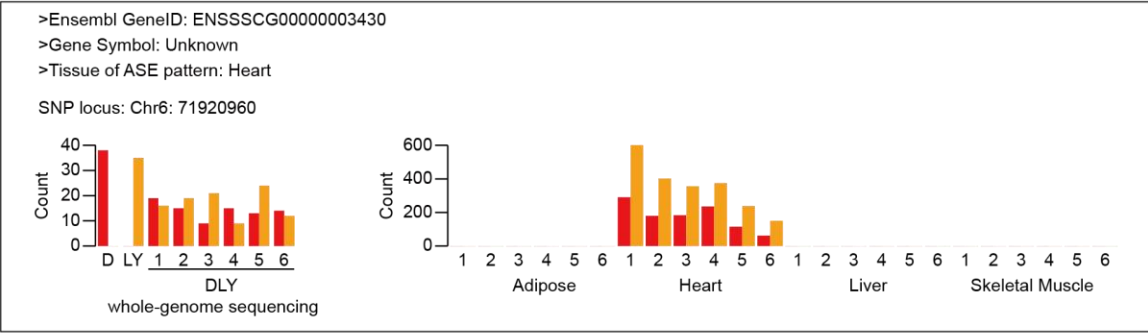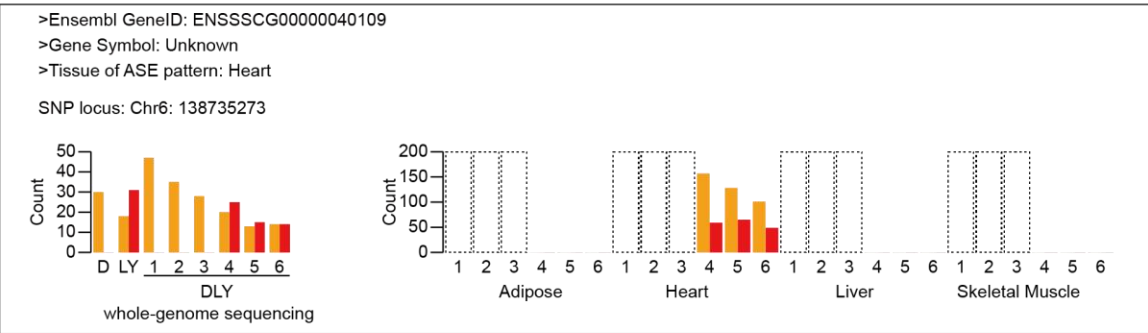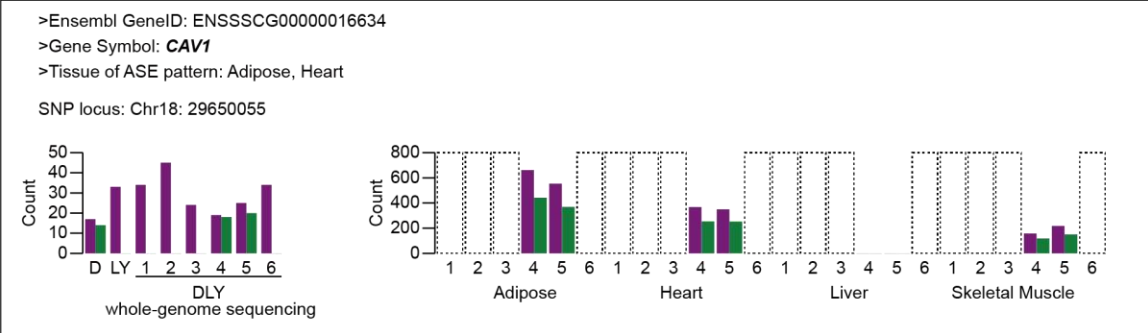

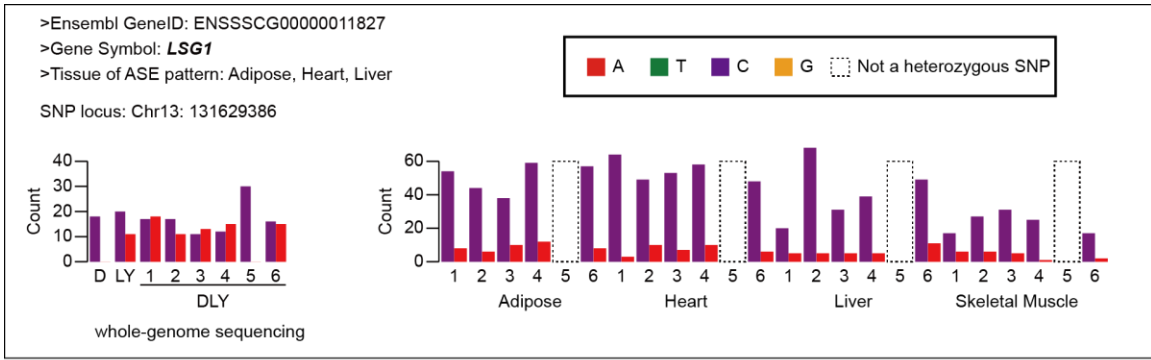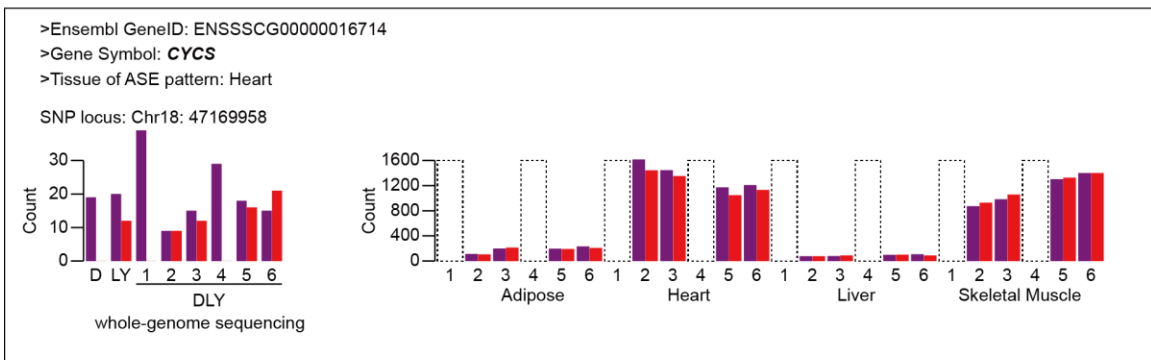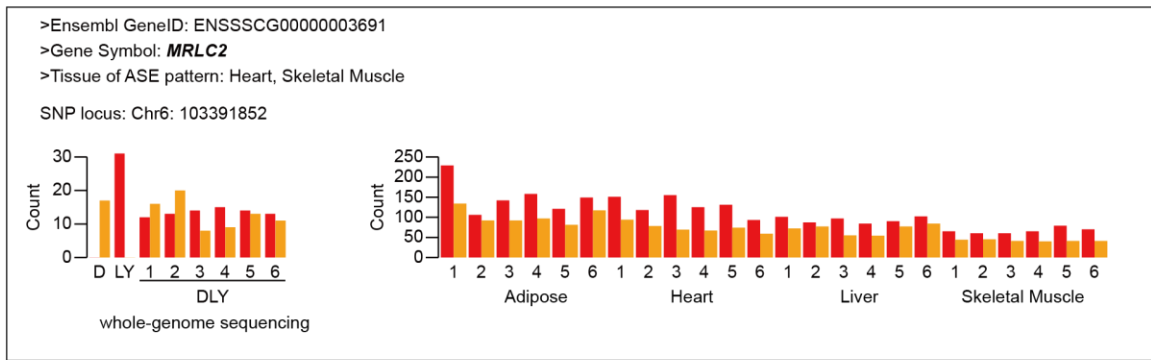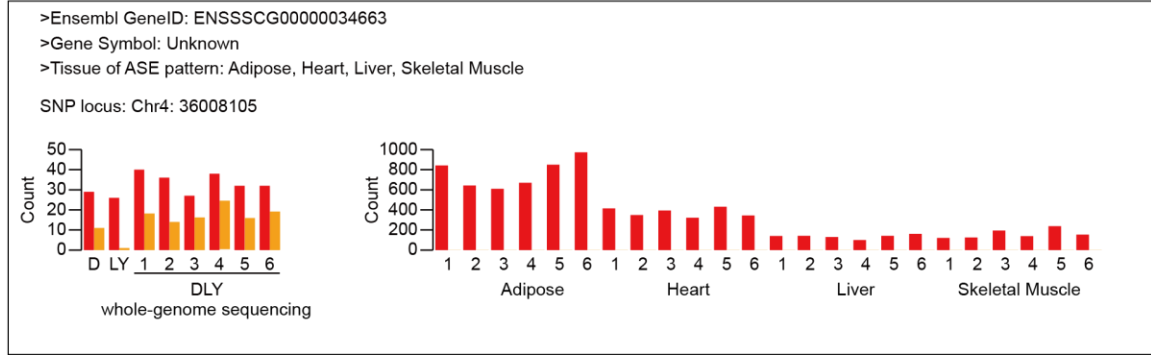

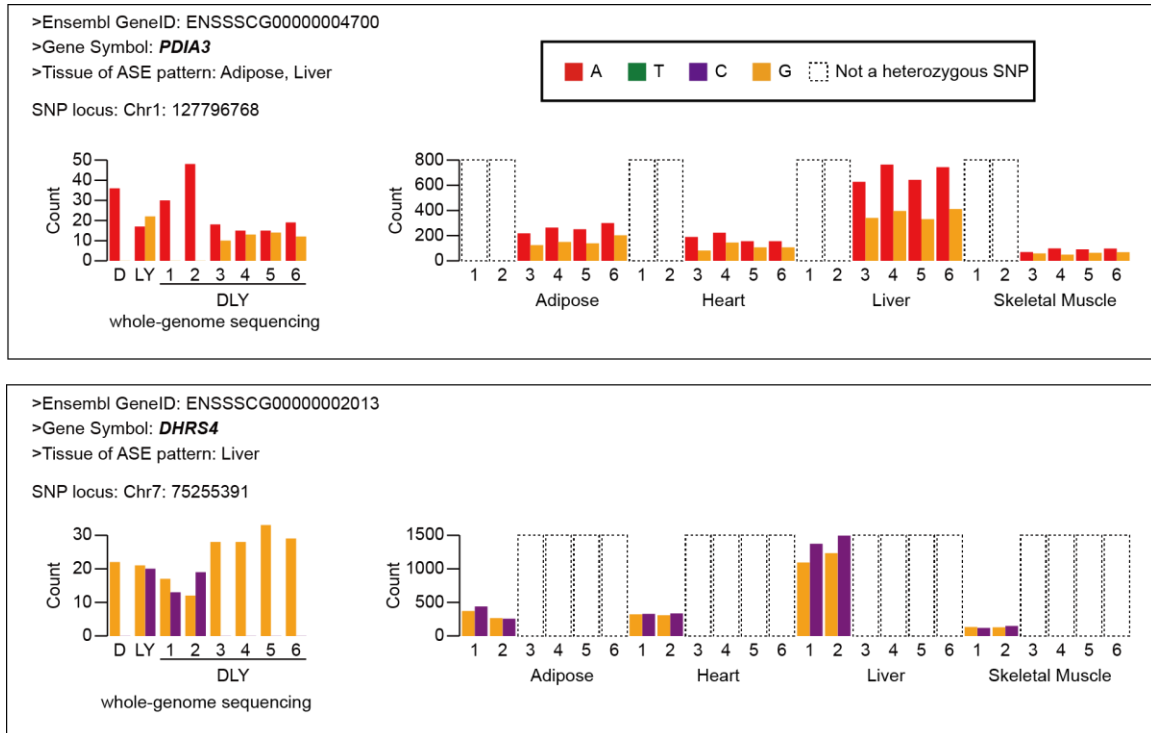

**Figure S7. Visualization of 50 random selected ASE genes.** The detail information of the representative SNP (maximum coverage) for each ASE gene, including the count distribution of whole-genome sequencing and the count distribution of RNA-seq of adipose, heart, liver and skeletal muscle were shown. These 50 ASE genes include *NDN*, *MTURN*, *ATP5PF*, *FBLIM1*, *APOE*, *ACOT4*, *GALNT16*, *FAH*, *EXOC2*, *ABCB11*, *SPP2*, *TM4SF20*, *GGCT*, *CYP4A24*, *TCP11L2*, *TAF13*, *CBR4*, *ENSSSCG00000035617*, *CTSB*, *RPL9*, *BOD1*, *MCFD2*, *MRPL24*, *SHISA2*, *IGF2*, *NSA2*, *GPX1*, *ENSSSCG00000035223*, *SGCE*, *YWHAZ*, *GSTA1*, *FMO5*, *SOD1*, *FOLR1*, *UGT2B31*, *FAAH*, *ANPEP*, *LDHB*, *CYP2D25*, *PTGR2*, *PPFIBP1*, *ENSSSCG0000003430*, *ENSSSCG00000040109*, *CAV1*, *LSG1*, *CYCS*, *MRLC2*, *ENSSSCG00000034663*, *PDIA3* and *DHRS4*.

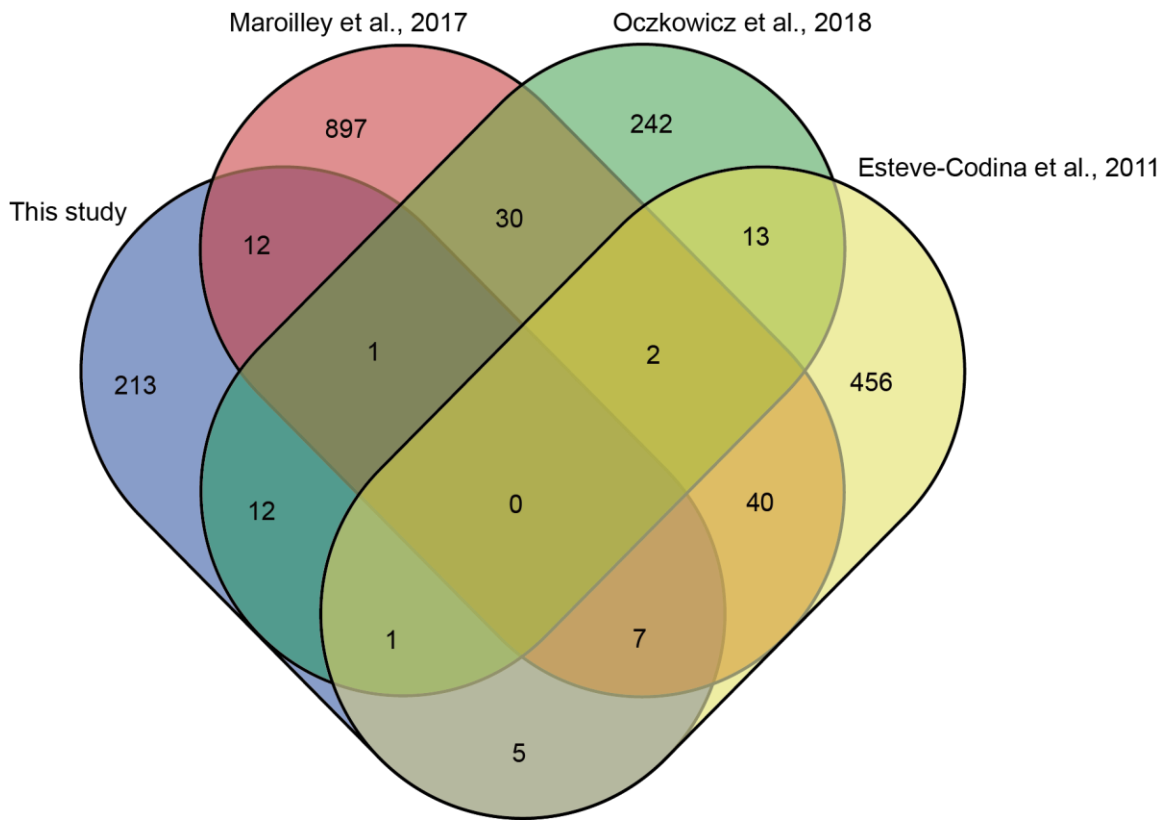

**Figure S8. Comparison of identified ASE genes with previous reported studies.**

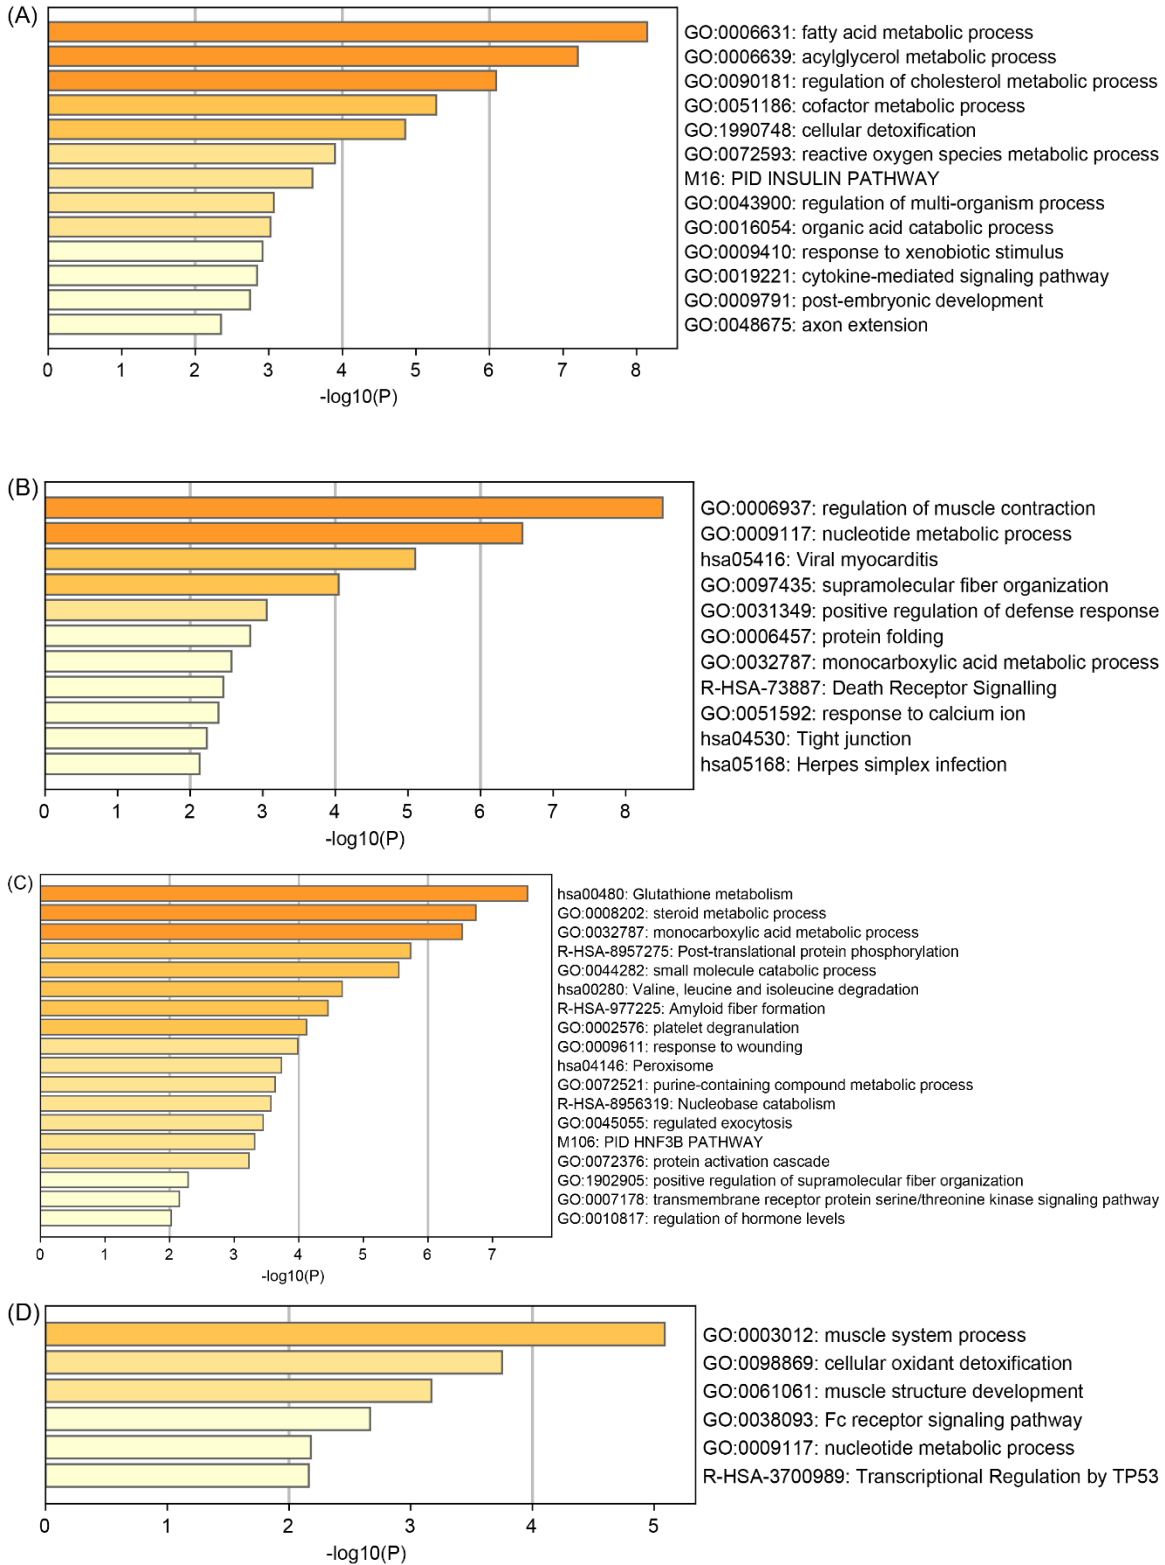

**Figure S9. Bargraphs of function enrichment for ASE genes in adipose (A), heart (B), liver (C) and skeletal muscle (D).**

**Table S1 Data summary and SNP statistics of the downloaded pig breeds**

| Breed   | Individual | Accession No. | High-quality data (Gb) | Coverage (×) | Number of SNPs |            |
|---------|------------|---------------|------------------------|--------------|----------------|------------|
|         |            |               |                        |              | Heterozygous   | Homozygous |
| D       | 1          | SRX703502     | 38.41                  | 15.36        | 2,970,948      | 1,970,902  |
|         | 2          | SRX703503     | 43.73                  | 17.49        | 2,915,641      | 1,961,520  |
|         | 3          | SRX703538     | 41.63                  | 16.65        | 3,017,625      | 1,926,350  |
|         | 4          | SRX703508     | 40.02                  | 16.01        | 3,131,836      | 1,817,067  |
|         | 5          | SRX703504     | 43.15                  | 17.26        | 2,739,820      | 1,947,156  |
|         | 6          | SRX703511     | 36.85                  | 14.74        | 2,997,191      | 1,956,779  |
|         | 7          | SRX703509     | 42.92                  | 17.17        | 2,788,873      | 1,991,953  |
|         | 8          | SRX703532     | 44.33                  | 17.73        | 2,853,844      | 1,923,391  |
|         | 9          | SRX703535     | 35.44                  | 14.18        | 2,939,385      | 2,032,922  |
|         | 10         | SRX703537     | 35.52                  | 14.21        | 3,079,185      | 1,879,770  |
|         | 11         | SRX703539     | 38.35                  | 15.34        | 3,045,528      | 1,883,315  |
| L       | 1          | SRX703541     | 35.62                  | 14.25        | 3,054,680      | 3,089,734  |
|         | 2          | SRX703540     | 34.61                  | 13.84        | 3,147,921      | 3,091,648  |
|         | 3          | SRX703542     | 33.61                  | 13.44        | 3,074,258      | 3,135,548  |
|         | 4          | SRX703543     | 32.42                  | 12.97        | 3,035,506      | 3,187,635  |
|         | 5          | SRX703548     | 33.23                  | 13.29        | 3,553,960      | 2,825,913  |
|         | 6          | SRX703550     | 32.84                  | 13.14        | 2,843,044      | 3,283,290  |
|         | 7          | SRX703552     | 33.25                  | 13.30        | 3,818,360      | 2,727,436  |
|         | 8          | SRX703551     | 32.62                  | 13.05        | 3,747,785      | 2,812,506  |
|         | 9          | SRX1544487    | 51.71                  | 20.68        | 3,029,667      | 2,967,386  |
| Y       | 1          | SRX703594     | 31.83                  | 12.73        | 2,895,003      | 3,365,363  |
|         | 2          | SRX703596     | 35.13                  | 14.05        | 3,646,253      | 2,814,432  |
|         | 3          | SRX703599     | 33.42                  | 13.37        | 3,462,828      | 3,063,392  |
|         | 4          | SRX703597     | 34.27                  | 13.71        | 3,511,229      | 3,076,198  |
|         | 5          | SRX703577     | 44.18                  | 17.67        | 3,050,148      | 3,261,253  |
|         | 6          | SRX703579     | 43.84                  | 17.54        | 3,210,946      | 3,054,866  |
|         | 7          | SRX703581     | 42.33                  | 16.93        | 3,226,449      | 3,159,891  |
|         | 8          | SRX703582     | 43.22                  | 17.29        | 3,331,057      | 3,026,034  |
|         | 9          | SRX703595     | 34.01                  | 13.60        | 3,133,195      | 3,047,464  |
|         | 10         | SRX1544506    | 51.63                  | 20.65        | 3,649,140      | 2,974,150  |
| average | -          | -             | 38.67                  | 15.47        | -              | -          |
| Total   | -          | -             | 1,160.12               | -            | 12,564,044     |            |

**Table S2 Data summary and SNP statistics of the DLY pig family**

| Breed /<br>Crossbred | Individual | High-quality<br>data (Gb) | Coverage (×) | Q20<br>(%) | Genome coverage at least |        |         | Number of SNPs |            |
|----------------------|------------|---------------------------|--------------|------------|--------------------------|--------|---------|----------------|------------|
|                      |            |                           |              |            | 1× (%)                   | 4× (%) | 10× (%) | Heterozygous   | Homozygous |
| D                    | 1          | 86.16                     | 34.44        | 96.52      | 99.53                    | 99.27  | 98.19   | 4,437,816      | 2,165,490  |
| L                    | 1          | 108.22                    | 43.28        | 96.64      | 99.45                    | 99.13  | 98.38   | 4,722,522      | 3,744,240  |
| Y                    | 1          | 90.43                     | 36.16        | 95.58      | 99.16                    | 98.85  | 98.01   | 5,444,996      | 3,399,276  |
| LY                   | 1          | 90.83                     | 36.32        | 95.13      | 99.12                    | 98.77  | 97.57   | 5,617,905      | 3,335,535  |
| DLY                  | 1          | 102.11                    | 40.84        | 95.53      | 99.57                    | 99.33  | 98.68   | 6,263,658      | 2,196,226  |
|                      | 2          | 98.62                     | 39.44        | 96.36      | 99.57                    | 99.34  | 98.68   | 6,163,204      | 2,206,296  |
|                      | 3          | 97.54                     | 39.00        | 95.65      | 99.57                    | 99.32  | 98.61   | 6,135,372      | 2,178,981  |
|                      | 4          | 94.87                     | 37.92        | 96.51      | 99.19                    | 98.97  | 98.45   | 6,115,540      | 2,208,917  |
|                      | 5          | 94.56                     | 37.80        | 96.09      | 99.19                    | 98.96  | 98.45   | 6,167,311      | 2,175,091  |
|                      | 6          | 99.12                     | 39.64        | 96.31      | 99.21                    | 98.98  | 98.48   | 6,201,672      | 2,243,369  |
| Average              | -          | 96.25                     | 38.51        | 96.03      | 99.36                    | 99.09  | 98.35   | -              | -          |
| Total                | -          | 962.46                    | -            | -          | -                        | -      | -       | 13,288,608     |            |



**Table S3 Validation of the accuracy of SNP identification by the chip**

| SNP type     | Category                    | D      | L      | Y      | LY     | DLY    |        |        |        |        |        |
|--------------|-----------------------------|--------|--------|--------|--------|--------|--------|--------|--------|--------|--------|
|              |                             |        |        |        |        | 1      | 2      | 3      | 4      | 5      | 6      |
| Homozygous   | SNPs identified by the chip | 4,323  | 8,740  | 7,560  | 7,698  | 4,586  | 4,742  | 4,464  | 4,447  | 4,645  | 4,549  |
|              | Validated by GATK           | 4,210  | 8,591  | 7,429  | 7,584  | 4,485  | 4,655  | 4,390  | 4,365  | 4,553  | 4,465  |
|              | Concordance ratio (%)       | 97.39  | 98.30  | 98.27  | 98.52  | 97.80  | 98.17  | 98.34  | 98.16  | 98.02  | 98.15  |
| Heterozygous | SNPs identified by the chip | 11,422 | 11,552 | 14,223 | 13,870 | 15,843 | 15,484 | 15,768 | 15,766 | 15,610 | 16,033 |
|              | Validated by GATK           | 11,254 | 11,303 | 13,873 | 13,664 | 15,613 | 15,243 | 15,527 | 15,528 | 15,390 | 15,814 |
|              | Concordance ratio (%)       | 98.53  | 97.84  | 97.53  | 98.51  | 98.55  | 98.44  | 98.47  | 98.49  | 98.59  | 98.63  |
| Total        | SNPs identified by the chip | 15,745 | 20,292 | 21,783 | 21,568 | 20,429 | 20,226 | 20,232 | 20,213 | 20,255 | 20,582 |
|              | Validated by GATK           | 15,464 | 19,894 | 21,300 | 21,248 | 20,098 | 19,898 | 19,917 | 19,893 | 19,943 | 20,279 |
|              | Concordance ratio (%)       | 98.22  | 98.04  | 97.78  | 98.52  | 98.38  | 98.38  | 98.44  | 98.42  | 98.46  | 98.53  |

**Table S4 Function enrichment of ASE genes in adipose**

| <b>Term</b> | <b>Description</b>                          | <b>Count</b> | <b>%</b> | <b>Log10(P)</b> | <b>Log10(q)</b> |
|-------------|---------------------------------------------|--------------|----------|-----------------|-----------------|
| GO:0006631  | fatty acid metabolic process                | 11           | 16.67    | -8.14           | -3.83           |
| GO:0006639  | acylglycerol metabolic process              | 7            | 10.61    | -7.20           | -3.46           |
| GO:0090181  | regulation of cholesterol metabolic process | 5            | 7.58     | -6.09           | -2.68           |
| GO:0051186  | cofactor metabolic process                  | 10           | 15.15    | -5.27           | -1.96           |
| GO:1990748  | cellular detoxification                     | 5            | 7.58     | -4.85           | -1.78           |
| GO:0072593  | reactive oxygen species metabolic process   | 6            | 9.09     | -3.90           | -1.24           |
| M16         | PID INSULIN PATHWAY                         | 3            | 4.55     | -3.59           | -1.07           |
| GO:0043900  | regulation of multi-organism process        | 6            | 9.09     | -3.07           | -0.73           |
| GO:0016054  | organic acid catabolic process              | 5            | 7.58     | -3.02           | -0.70           |
| GO:0009410  | response to xenobiotic stimulus             | 5            | 7.58     | -2.91           | -0.60           |
| GO:0019221  | cytokine-mediated signaling pathway         | 8            | 12.12    | -2.84           | -0.54           |
| GO:0009791  | post-embryonic development                  | 3            | 4.55     | -2.74           | -0.47           |
| GO:0048675  | axon extension                              | 3            | 4.55     | -2.35           | -0.17           |

**Table S5 Function enrichment of ASE genes in heart**

| <b>Term</b> | <b>Description</b>                      | <b>Count</b> | <b>%</b> | <b>Log10(P)</b> | <b>Log10(q)</b> |
|-------------|-----------------------------------------|--------------|----------|-----------------|-----------------|
| GO:0006937  | regulation of muscle contraction        | 8            | 15.38    | -8.51           | -4.35           |
| GO:0009117  | nucleotide metabolic process            | 11           | 21.15    | -6.58           | -3.34           |
| hsa05416    | Viral myocarditis                       | 4            | 7.69     | -5.10           | -2.27           |
| GO:0097435  | supramolecular fiber organization       | 8            | 15.38    | -4.05           | -1.50           |
| GO:0031349  | positive regulation of defense response | 6            | 11.54    | -3.05           | -0.71           |
| GO:0006457  | protein folding                         | 4            | 7.69     | -2.83           | -0.54           |
| GO:0032787  | monocarboxylic acid metabolic process   | 6            | 11.54    | -2.57           | -0.30           |
| R-HSA-73887 | Death Receptor Signalling               | 3            | 5.77     | -2.46           | -0.21           |
| GO:0051592  | response to calcium ion                 | 3            | 5.77     | -2.39           | -0.17           |
| hsa04530    | Tight junction                          | 3            | 5.77     | -2.23           | -0.05           |
| hsa05168    | Herpes simplex infection                | 3            | 5.77     | -2.13           | 0.00            |

**Table S6 Function enrichment of ASE genes in liver**

| <b>Term</b>       | <b>Description</b>                                                       | <b>Count</b> | <b>%</b> | <b>Log10(P)</b> | <b>Log10(q)</b> |
|-------------------|--------------------------------------------------------------------------|--------------|----------|-----------------|-----------------|
| hsa00480          | Glutathione metabolism                                                   | 6            | 7.32     | -7.54           | -3.22           |
| GO:0008202        | steroid metabolic process                                                | 10           | 12.20    | -6.74           | -2.90           |
| GO:0032787        | monocarboxylic acid metabolic process                                    | 13           | 15.85    | -6.53           | -2.88           |
| R-HAS<br>8957275  | Post-translational protein phosphorylation                               | 6            | 7.32     | -5.73           | -2.27           |
| GO:0044282        | small molecule catabolic process                                         | 10           | 12.20    | -5.55           | -2.27           |
| hsa00280          | Valine, leucine and isoleucine degradation                               | 4            | 4.88     | -4.67           | -1.71           |
| R-HSA-<br>977225  | Amyloid fiber formation                                                  | 5            | 6.10     | -4.45           | -1.63           |
| GO:0002576        | platelet degranulation                                                   | 5            | 6.10     | -4.12           | -1.41           |
| GO:0009611        | response to wounding                                                     | 10           | 12.20    | -3.99           | -1.34           |
| hsa04146          | Peroxisome                                                               | 4            | 4.88     | -3.73           | -1.23           |
| GO:0072521        | purine-containing compound metabolic process                             | 9            | 10.98    | -3.63           | -1.16           |
| R-HSA-<br>8956319 | Nucleobase catabolism                                                    | 3            | 3.66     | -3.57           | -1.14           |
| GO:0045055        | regulated exocytosis                                                     | 10           | 12.20    | -3.45           | -1.05           |
| M106              | PID HNF3B PATHWAY                                                        | 3            | 3.66     | -3.32           | -0.97           |
| GO:0072376        | protein activation cascade                                               | 5            | 6.10     | -3.23           | -0.92           |
| GO:1902905        | positive regulation of supramolecular fiber organization                 | 4            | 4.88     | -2.29           | -0.20           |
| GO:0007178        | transmembrane receptor protein serine/threonine kinase signaling pathway | 5            | 6.10     | -2.15           | -0.13           |
| GO:0010817        | regulation of hormone levels                                             | 6            | 7.32     | -2.02           | -0.04           |

**Table S7 Function enrichment of ASE genes in skeletal muscle**

| <b>Term</b>   | <b>Description</b>                 | <b>Count</b> | <b>%</b> | <b>Log10(P)</b> | <b>Log10(q)</b> |
|---------------|------------------------------------|--------------|----------|-----------------|-----------------|
| GO:0003012    | muscle system process              | 6            | 23.08    | -5.09           | -0.77           |
| GO:0098869    | cellular oxidant detoxification    | 3            | 11.54    | -3.75           | 0.00            |
| GO:0061061    | muscle structure development       | 5            | 19.23    | -3.17           | 0.00            |
| GO:0038093    | Fc receptor signaling pathway      | 3            | 11.54    | -2.67           | 0.00            |
| GO:0009117    | nucleotide metabolic process       | 4            | 15.38    | -2.18           | 0.00            |
| R-HSA-3700989 | Transcriptional Regulation by TP53 | 3            | 11.54    | -2.16           | 0.00            |
